# 1 Identifying Mangrove-Coral Habitats in the Florida 2 Keys

3  
4  
5 Christina A. Kellogg<sup>1</sup>, Ryan P. Moyer<sup>2</sup>, Mary Jacobsen<sup>2</sup>, Kimberly K. Yates<sup>1</sup>

6  
7 <sup>1</sup> St. Petersburg Coastal and Marine Science Center, U.S. Geological Survey, St. Petersburg, FL,  
8 USA

9 <sup>2</sup> Fish and Wildlife Research Institute, Florida Fish & Wildlife Conservation Commission, St.  
10 Petersburg, FL, USA

11  
12 Corresponding Author:

13 Christina Kellogg<sup>1</sup>

14 600 Fourth Street South, St. Petersburg, FL, 33701, USA

15 Email address: [ckellogg@usgs.gov](mailto:ckellogg@usgs.gov)

## 21 Abstract

22 Coral reefs are degrading due to many synergistic stressors. Recently there have been a number  
23 of global reports of corals occupying mangrove habitats that provide a supportive environment or  
24 refugium for corals, sheltering them by reducing stressors such as oxidative light stress and low  
25 pH. This study used satellite imagery and manual ground-truthing surveys to search for  
26 mangrove-coral habitats in the Florida Keys and then collected basic environmental parameters  
27 (temperature, salinity, dissolved oxygen, pH<sub>NBS</sub>, turbidity) at identified sites using a multi-  
28 parameter water quality sonde. Two kinds of mangrove-coral habitats were found in both the  
29 Upper and Lower Florida Keys: (1) prop-root corals, where coral colonies were growing directly  
30 on (and around) mangrove prop roots, and (2) channel corals, where coral colonies were growing  
31 in mangrove channels under the shade of the mangrove canopy, at deeper depths and not in as  
32 close proximity to the mangroves. Coral species found growing on and directly adjacent to prop  
33 roots included *Porites porites* (multiple morphs), *Siderastrea radians* and *Favia fragum*.  
34 Channel coral habitats predominantly hosted *S. radians* and a few *S. siderea*, although single  
35 colonies of *Solenastrea bournoni* and *Stephanocoenia intersepta* were observed. Circumstantial  
36 evidence suggests additional coral communities existed on mangrove shorelines of oceanside and  
37 backcountry islands until destroyed, likely by Hurricane Irma. These mangrove-coral habitats  
38 may be climate refugia for corals and could be included in ecosystem management plans and  
39 considered for their applications in coral restoration, for example, as a source of adapted genetic

40 resources, places to support growth and acclimation of coral outplants, or natural laboratories to  
41 test survival of different genotypes.

42

## 43 **Introduction**

44 Coral reef ecosystems support up to 25% of fisheries in tropical regions and developing nations  
45 (Garcia & de Leiva Moreno 2003) and economic and recreational services for more than 100  
46 countries (Burke et al. 2011). Reef framework and shallow, non-coral-dominated habitats serve  
47 as natural barriers that protect shoreline ecosystems and coastal communities by reducing  
48 hazards from waves, storm surges, and tsunamis for more than 200 million people around the  
49 world (Ferrario et al. 2014; Sheppard et al. 2005). However, coral reefs worldwide, and the  
50 important ecosystem services they provide, are in a state of critical decline due to a number of  
51 synergistic local and global stressors, including coral bleaching, disease, coastal development,  
52 overfishing, and nutrient enrichment (Glynn 1984; Precht et al. 2016; Vega Thurber et al. 2013;  
53 Weil & Rogers 2011; Yates et al. 2017; Zaneveld et al. 2016).

54

55 Coral reef degradation and the causes have been documented since the 1970s (Bruckner & Hill  
56 2009; Gardner et al. 2003; Hughes 1994; Pandolfi et al. 2003), however models suggest nearly  
57 66 % of coral reefs worldwide will continue to undergo rapid degradation over the next few  
58 decades due to warming and ocean acidification (Frieler et al. 2013). Ocean acidification results  
59 from increasing storage of atmospheric carbon dioxide in the surface ocean, lowering the  
60 aragonite saturation state and reducing seawater pH. Coastal acidification caused by  
61 eutrophication, coastal upwelling and freshwater inflow also reduces seawater pH and aragonite  
62 saturation state. Both of these processes can slow coral growth and contribute to chemical  
63 dissolution of reefs (Comeau et al. 2014; Eyre et al. 2018). Reefs in the Florida Keys are already  
64 being affected by coastal acidification, likely driven by nutrient inputs resulting in seasonal  
65 dissolution of carbonate sediments (Muehllehner et al. 2016) that may be accounting for  
66 approximately 15% of seafloor elevation loss in the Upper Florida Keys (Yates et al. 2017).  
67 Solar radiation and high water temperatures cause coral bleaching that has resulted in extensive  
68 coral mortality as well as predisposing the survivors to coral disease (Miller et al. 2009; Muller  
69 et al. 2008; Rogers et al. 2009; Williams & Bunkley-Williams 1990). Coral diseases continue to  
70 emerge, including Stony Coral Tissue Loss Disease (SCTLD) which has severely impacted the  
71 Florida reef tract since 2014 and is now spreading to the wider Caribbean basin (Precht et al.  
72 2016; Walton et al. 2018; Weil et al. 2019).

73

74 Evidence that repeated coral bleaching events (Baker et al. 2008; Eakin et al. 2010; Lesser 2011),  
75 coastal and ocean acidification (Fabricius et al. 2011; Kleypas & Yates 2009; Kroeker et al.  
76 2013; Muehllehner et al. 2016; Silverman et al. 2009), coupled with severe and pervasive  
77 outbreaks of coral disease will severely impede coral growth within the next few decades (Burke  
78 et al. 2011; Hoegh-Guldberg et al. 2007; van Hooidonk et al. 2014) has prompted an urgent  
79 search for coral reef systems that provide natural refugia from climate threats. Keppel et al.

80 (2012) define refugia as “habitats that components of biodiversity retreat to, persist in, and can  
81 potentially expand from under changing environmental conditions.” The complex interplay  
82 among climate, oceanographic, and biological factors that influences susceptibility and resilience  
83 of reefs has made identification and characterization of such refugia for corals challenging.

84  
85 Conservation and management strategies include the establishment of marine protected areas  
86 with environmental conditions that promote coral resiliency. Focus has been placed on  
87 identifying reefs with low exposure to or potential for adaptation to climate threats, and reduced  
88 local anthropogenic impacts (Keller et al. 2009; Mumby & Steneck 2008; Salm et al. 2006; West  
89 & Salm 2003). Recent studies have identified only one reef in the Florida Keys as a potential  
90 refuge from ocean acidification (Manzello et al. 2012). Mangrove communities, while often near  
91 coral reef ecosystems, are not typically thought of as having suitable conditions for coral  
92 recruitment and growth due to high sedimentation rates, lack of suitable substratum, and  
93 inadequate water quality. Further, ecological surveys of Florida mangroves from the 1930s and  
94 1980s made no mention of the presence of corals when detailing associated fauna (Davis 1940;  
95 Odum et al. 1982). However, a number of recent studies have identified several locations around  
96 the world with corals growing on or near mangrove prop roots (Camp et al. 2019; Camp et al.  
97 2017; Macintyre et al. 2000; Rogers 2009; Rogers 2017). In some of these habitats, mangroves  
98 are sheltering corals even in the face of extreme variability in pH, dissolved oxygen, and  
99 temperature, resulting in lower incidences of bleaching and high rates of recovery (Camp et al.  
100 2019; Camp et al. 2017; Yates et al. 2014). The mangrove-canopy shading reduces light stress  
101 and a combination of hydrodynamic and biogeochemical processes in some of these mangrove-  
102 coral habitats can locally buffer pH (Yates et al. 2014). This is the first study to systematically  
103 search for and identify mangrove-coral habitats in the Florida Keys and provide a basic  
104 environmental characterization of them.

105

## 106 **Materials & Methods**

107

### 108 **Site selection**

109 Several areas in the Upper and Lower Florida Keys were identified as target areas based on  
110 previous unpublished observations by the authors, and/or anecdotal personal communication  
111 from other researchers that have worked in the Florida Keys, that corals had been previously  
112 observed in or near mangrove shorelines. Additional target areas were chosen by using satellite  
113 images from Google Earth Pro (Version 7.3, Google LLC, Mountain View CA, USA) to identify  
114 mangrove shorelines that were adjacent to tidal channels with one or more of the following  
115 criteria: (i) deep enough to support corals at all stages of the tidal cycle, (ii) deep enough, or with  
116 visible evidence (e.g., tidal deltas present) to suggest strong current flow, (iii) clear water, (iv) a  
117 connection to the open ocean, and (v) areas where hard substrate was mapped adjacent to  
118 mangroves on the Florida Fish and Wildlife Conservation Commission (FWC)’s Unified Reef  
119 Map (<https://myfwc.com/research/gis/regional-projects/unified-reef-map/>). Some mangrove-

120 lined channels that could not be easily observed via satellite were included for ground truthing.  
121 Heavily built areas (e.g., Key Largo, Marathon, Key West) were avoided since they were likely  
122 to have fewer mangrove-lined shorelines and poorer water quality.

123

### 124 **Field surveys**

125 Maps of target areas were used to guide visual surveys of mangrove shorelines and channels.  
126 Surveys were conducted between 0800–1700 for optimal lighting. Areas in the Upper Keys  
127 (Biscayne Bay/Card Sound/Largo Sound) were surveyed 4–8 October 2019 and areas in the  
128 Lower Keys (between Big Pine Key and Boca Chica Key) were surveyed 7–11 January 2020.  
129 Depending on accessibility, surveys for the presence of corals growing on mangrove prop roots  
130 or in channels shaded by the mangrove canopy were conducted by boating at very low speed,  
131 paddleboard, or snorkeling. Areas surveyed were recorded using a hand-held wide-area-  
132 augmentation-system (WAAS)-corrected global position system (GPS). When corals were  
133 located in mangrove habitats, each coral species and their corresponding abundances were  
134 recorded and representative photographs of the corals were taken. The following environmental  
135 parameters were measured using a hand-held multi-parameter water-quality sonde (YSI ProDSS,  
136 Xylem Inc., Yellow Springs OH, USA): water temperature (degrees Celsius), salinity, dissolved  
137 oxygen (mg/L), turbidity (Formazin nephelometric units, FNU),  $\text{pH}_{\text{NBS}}$  (to estimate relative  
138 differences in pH between mangrove-coral and reference habitats), and pressure (dbar) to  
139 estimate water depth (meters).

140

### 141 **Area surveyed**

142 Way points from the GPS were plotted daily after each survey in Google Earth Pro. The Google  
143 Earth KMZ file was then imported into ArcGIS Pro (Esri Inc., Redlands CA, USA) to create  
144 maps with track lines to represent the surveyed areas. The length of the track lines was calculated  
145 by ArcGIS Pro based on the WGS84 Web Mercator (Auxiliary Sphere) projection used for the  
146 National Agriculture Imagery Program (NAIP) base map. The calculated length of the track lines  
147 was summed to obtain the estimated kilometers of mangrove shoreline surveyed.

148

## 149 **Results**

150 The total linear distance of mangrove shoreline that was surveyed during this project was  
151 approximately 76 km. The surveys identified two kinds of mangrove-coral habitats in the Florida  
152 Keys: (1) prop-root corals, where colonies were growing directly on (and in close proximity to,  
153 defined as less than 0.5 m) mangrove prop roots, and (2) channel corals, where colonies were  
154 growing in tidal channels between mangrove shorelines, such that the corals were shaded during  
155 at least part of the day by the mangrove canopy, but not close to prop roots.

156

### 157 **Upper Keys Surveys**

158 Approximately 55 km of mangrove shoreline in the Upper Florida Keys, including parts of Card  
159 Sound and Largo Sound, were surveyed 4–8 October 2019 (Figs. 1 and 2). An additional

160 mangrove-lined tidal channel (not shown in Fig. 1) was surveyed in North Key Largo from the  
161 southern end of Card Sound to an impassable bridge clearance beneath Card Sound Road. In this  
162 channel, the water was very turbid, appearing opaque dark brown in color, and no corals were  
163 observed there. Both prop-root and channel coral habitats were observed in the Upper Keys and  
164 environmental data were collected at representative sites (Table 1). All sites with prop-root  
165 corals were found along the northern side of a deeply incised channel next to Swan Key (inset,  
166 Fig. 1) and featured at least two different morphotypes of *Porites porites* and one encrusting  
167 *Siderastrea radians* colony (Table 1, Fig. 3). Prop-root corals in the Upper Keys ranged in size  
168 (longest nominal axis) from 2–20 cm. Channel coral habitat was found in mangrove-lined tidal  
169 channels cutting through the interior of islands (e.g., Swan Creek, inset, Fig. 1), and featured  
170 small colonies of *Siderastrea siderea*, *S. radians*, and *Stephanocoenia intersepta* (Table 1, Fig.  
171 3). Clusters of small coral colonies were occasionally observed in some wider interior channels  
172 that were not being shaded by mangroves (Angelfish Key, Old Rhodes Key). Channel corals in  
173 the Upper Keys ranged in size (longest nominal axis) from 2–25 cm. All of the tidal channels  
174 surveyed around Largo Sound (Fig. 2) had discolored water with high turbidity and low  
175 visibility, and no corals were seen in spite of previously reported anecdotal sightings. A location  
176 in these channels was chosen to collect environmental data as a non-coral-habitat reference site  
177 for comparison (Table 1, Fig. 2).

178  
179 A two-sample t-test assuming unequal variances and two tails was performed in Microsoft Excel  
180 (Microsoft Inc., Redmond WA, USA) to test for differences between Upper Keys channel coral  
181 habitats and prop-root-coral habitats based on the data in Table 1. There were no significant  
182 differences in temperature, pH, or turbidity between the two habitat types. However, there were  
183 significant differences in salinity (channel corals mean  $36.39 \pm 0.014$ ; prop-root corals mean  
184  $36.84 \pm 0.002$ ;  $t_{\text{stat}} = -6.71$ , d.f. = 4,  $p = 0.003$ ) and dissolved oxygen (channel corals mean  $4.54 \pm$   
185  $0.056$ ; prop-root corals mean  $5.71 \pm 0.117$ ;  $t_{\text{stat}} = -5.08$ , d.f. = 3,  $p = 0.015$ ). This may reflect the  
186 difference between the physical characteristics (depth, current velocity, and oceanic influence)  
187 on the channel with prop-root corals versus the tidal creek hosting corals mid-channel (Fig. 1).  
188 Because environmental data were only collected at one non-coral reference site (Fig. 2), it is not  
189 possible to test for significant differences between target and reference habitats; however, both  
190 dissolved oxygen concentrations and pH values were much lower at the Upper Keys reference  
191 site compared to both types of mangrove-coral habitats (Table 1).

## 192 193 **Lower Keys Surveys**

194 Approximately 21 km of linear mangrove shoreline was surveyed in the Lower Florida Keys  
195 between Big Pine Key and Boca Chica Key from 7–11 January 2020 (Fig. 4). Both prop-root-  
196 and channel-coral habitats were observed in the Lower Keys and environmental data were  
197 collected at representative sites (Tables 2 and 3). Although surveys included mangrove  
198 shorelines on the ocean side islands and in the more protected backcountry islands, all prop-root-  
199 coral sites were found in natural tidal channels or man-made canals connecting the Atlantic

200 Ocean with Upper Sugarloaf Sound, with the exception of Park Channel, which connects Lower  
201 and Upper Sugarloaf Sounds (Fig. 4). The most common species observed growing on prop roots  
202 was *Porites porites* (Table 2, Fig. 5). The highest diversity and largest abundance of individual  
203 colonies of prop-root and shaded corals (species: *Porites porites*, *Siderastrea radians*, and *Favia*  
204 *fragum*) was found in a man-made canal dredged through Pleistocene bedrock (Miami Limestone  
205 formation) of Sugarloaf Key, connecting Upper Sugarloaf Sound and the Atlantic Ocean. This  
206 dredged canal runs parallel to Sugarloaf Boulevard and passes under the Loop Road Bridge. It is  
207 cataloged in the Monroe County Canal Management Master Plan as “430 Sugarloaf Key Merged  
208 Canal.” Channel corals, mainly *S. radians*, were observed in Tarpon Creek and throughout the  
209 length of 430 Sugarloaf Key Merged Canal (Table 2, Fig. 5). Prop-root corals in the Lower Keys  
210 ranged in size (longest nominal axis) from 5–25 cm and channel corals ranged between 1–35 cm  
211 in size.

212  
213 A two-sample t-test assuming unequal variances and two tails was performed in Microsoft Excel  
214 to test for differences between Lower Keys channel-coral habitats and prop-root-coral habitats  
215 based on the data in Table 2. The only environmental variable that was significantly different  
216 was temperature and that can be attributed to the differences between days and sampling times,  
217 whereby more prop-root-coral sites were visited in the afternoon or were visited on 11 January,  
218 when surface-water temperatures were above 22°C. Both prop-root- and channel-coral habitats in  
219 the Lower Keys occurred in inland tidal channels and canals, so it is not unexpected that major  
220 differences were not detected among measured environmental parameters at each type of site.

221  
222 A two-sample t-test assuming unequal variances and two tails was performed in Microsoft Excel  
223 to test for differences between the prop-root-coral sites and reference sites based on data in Table  
224 3 that were collected on the same day to minimize astochastic variability introduced by sampling  
225 at different times of day on multiple days. Reference sites were those with open water,  
226 mangrove-lined shorelines or confined tidal channels that did not serve as habitat for prop-root or  
227 channel corals. The only environmental parameter in the Lower Keys that was significantly  
228 different between prop-root-coral sites and reference sites was turbidity (Table 3; prop-root-coral  
229 sites mean  $1.1 \pm 0.115$ ; reference sites mean  $2.8 \pm 1.630$ ;  $t_{\text{stat}} = 3.16$ , d.f. = 6,  $p = 0.02$ ).

230  
231 Note that there was no combined analysis of environmental data from Upper and Lower Keys  
232 surveys because they were conducted during different seasons. Seasonality would not affect the  
233 presence or absence of corals, but could confound any observed differences in environmental  
234 data.

## 235 236 **Discussion**

237 The mangrove-coral habitats identified in the Florida Keys during this project did not appear to  
238 be subject to extreme environmental variability like those reported in New Caledonia and  
239 Australia (Camp et al. 2019; Camp et al. 2017). In that respect, the sites we surveyed were more

240 similar to the mangrove-coral habitats of the U.S. Virgin Islands (Rogers 2017; Yates et al.  
241 2014); however, the Keys habitats hosted substantially lower diversity of corals and were  
242 dominated by stress-resilient species, primarily *P. porites* and *S. radians* (Lirman et al. 2002).  
243 However, we did document the presence of other coral species, more commonly in the channel-  
244 coral habitats than the prop-root-coral habitats (Tables 1 and 2): *Favia fragum*, *S. siderea*, *So.*  
245 *bournoni*, *St. intersepta*. Our environmental measurements (Tables 1-3) fall within the normal  
246 mean ranges measured on Florida Keys inshore and offshore reefs in recent decades:  
247 temperatures were compared against the multi-decadal data available from National Oceanic and  
248 Atmospheric Administration (NOAA)'s National Data Buoy Center ([www.ndbc.noaa.gov](http://www.ndbc.noaa.gov));  
249 salinity and dissolved oxygen were compared against water quality data from the Florida Keys  
250 National Marine Sanctuary (Briceño & Boyer 2015). The pH values we measured are relative  
251 and therefore could not be compared accurately to absolute data. However, it is likely the  
252 extremes in environmental variables rather than the means that determine the ability of corals to  
253 survive in these particular locations.

254  
255 The Florida Keys episodically experience cold fronts that can push water temperatures below the  
256 16–18°C lower limit of tropical scleractinian tolerance for several days causing mass coral  
257 mortality, as occurred in 1977 and 2010 (Lirman et al. 2011; Roberts et al. 1982). However, for  
258 cold or cool weather pulses of lesser duration, we hypothesize that mangrove-coral habitats may  
259 be somewhat thermally buffered by the microclimate effect of the mangrove canopy and the  
260 retention of heat by peat and porewaters (Osland et al. 2019).

261  
262 The full extent of benefits that may be derived by corals in mangrove habitats remains to be  
263 determined. The experimentally proven advantages in the Virgin Islands included carbonate  
264 system buffering and reduction of oxidative stress via shading (Yates et al. 2014). Other  
265 observed benefits include lower incidence of bleaching and/or more rapid recovery from  
266 bleaching (Camp et al. 2017; Yates et al. 2014). Given that bleaching has been linked to  
267 increased subsequent mortality by disease (Miller et al. 2009; Rogers et al. 2009), these  
268 mangrove-coral habitats may also provide indirect protection against coral disease. In the Lower  
269 Keys, we detected a significant difference in turbidity between coral and reference habitats. High  
270 turbidity in mangrove-adjacent waters is typically caused by the high input of dissolved and  
271 particulate organic matter derived from the direct productivity of the mangrove forest (Alongi  
272 2014). Some components of dissolved organic matter can function as antioxidants and this  
273 activity has been documented to be particularly high in Florida mangrove environments, likely  
274 due to their release of polyphenols and tannins, which are known antioxidants (Romera-Castillo  
275 & Jaffé 2015). This may be an added benefit provided to corals by mangroves in addition to the  
276 physical shading. It was noted that corals growing on prop roots occurred where the roots  
277 reached deep enough under water to not expose the coral at low tide, which, when combined  
278 with higher turbidity, also allows for light attenuation and thus less oxidative stress. In the Lower  
279 Keys, the majority of prop-root corals were found on the western side of the canals, which was

280 shaded from the afternoon sun by the mangrove canopy. The Tarpon Canal coral (P4) and the  
281 three prop-root corals in the Upper Keys (P1-P3) were all on the north side of channels. In 430  
282 Sugarloaf Key Merged Canal we found corals growing on prop roots on both the east (P7) and  
283 west (P8-P15) sides of the channel. However, the corals growing on the very shallow substrate  
284 directly adjacent to mangroves in 430 Sugarloaf Key Merged Canal were found primarily on the  
285 western side of the channel where they were shaded by afternoon sun.

286

287 The prop-root corals in the Upper Keys occurred where it was hypothesized they would be, on  
288 the edges of deep channels with fast-moving currents that were directly connected to open-ocean  
289 water (Fig. 1). However, in the Lower Keys, all the mangrove-coral habitats were observed in  
290 protected internal/inland water bodies (Fig. 4) rather than on mangrove islands closer to oceanic  
291 water (i.e., along the Atlantic-facing side of offshore islands or along the Gulf of Mexico coast of  
292 the backcountry islands). In fact, the most heavily populated area of mangrove-coral habitat  
293 (both prop-root and channel corals) surveyed was in the 430 Sugarloaf Key Merged Canal (inset,  
294 Fig. 4). This man-made canal runs for a length of 1,840 meters and when surveyed for water  
295 quality in 2013, it was noted to have “excellent biodiversity,” possibly referring to the visible  
296 coral colonies growing in it (Monroe County Canal Management Master Plan, September 20,  
297 2013). Using spatio-temporal modeling, a recent paper determined that SCTLD appears to move  
298 via bottom currents and sediment (Muller et al. 2020), so the disease may not easily transmit into  
299 channels and canals where corals are growing, affording them some protection. Further,  
300 Bayesian models suggested that corals on high-diversity reefs and on deep reefs were at greater  
301 risk of SCTLD than corals on shallow and low-diversity reefs (Muller et al. 2020). Combined,  
302 these modeling results indicate that these inland tidal channels and man-made canals may benefit  
303 from physical/hydrographic impediments to the movement of the coral disease. It is worth noting  
304 that the colony sizes observed growing on prop-roots (Figs. 3 and 5) indicate that these corals  
305 were present prior to the stony coral tissue loss disease outbreak moving through these parts of  
306 the Florida reef tract in 2016–2018. However, the main corals observed growing on prop roots  
307 were *P. porites*, a species which is less susceptible to SCTLD and has been shown by Florida  
308 Keys coral surveys to be increasing in abundance in spite of the outbreak (Muller et al. 2020;  
309 Walton et al. 2018).

310

311 Could these mangrove-coral habitats be functioning as refugia? We argue the possibility exists  
312 for these environments to be (i) thermal refugia (via microclimate insulation against cold and  
313 shading against heat), (ii) acidification refugia (via buffering pH), (iii) oxidative stress refugia  
314 (via shading and mangrove antioxidants), (iv) disease refugia (via hydrographic transmission  
315 limitation of the channels), (v) storm refugia (inland tidal creeks and channels may be more  
316 protected from heavy wave action and sedimentation), or (vi) various combinations thereof. It is  
317 worth testing these hypotheses to determine whether these Florida Keys mangrove-coral habitats  
318 could offer specific protection for corals. If so, that might make them suitable as temporary or  
319 longer-term nurseries to support growth and acclimation of coral outplants or natural laboratories



320 to test survival of different coral genotypes. Both prop-root and channel corals identified in this  
321 study could be sources for genetic alleles adapted to extreme environments, worth investigating  
322 for inclusion in restoration efforts seeking to increase genetic diversity (Baums 2008; Baums et  
323 al. 2019).

324  
325 Observational evidence from the Lower Keys surveys suggested that there could have been  
326 mangrove-coral habitats with higher coral diversity on some of the more open-water shorelines  
327 but that they were destroyed, possibly during the passage of Hurricane Irma, which made direct  
328 landfall as a category 4 storm on Cudjoe Key in September 2017. Coral rubble from multiple  
329 species was observed in uncompacted sediment layers among mangrove prop roots at both  
330 oceanside (east of Cook Island) and backcountry (Johnston Key mangroves) sites. It is possible  
331 that the coral rubble was transported to these sites by the storm. However, dead coral nubbins  
332 that remained attached to the substrata could be felt beneath the sediment layer along the  
333 mangrove fringe at the Cook Island site. In the backcountry, there were several sites along the  
334 Gulf of Mexico-facing shore where the mangrove prop roots had been scoured clean (e.g.,  
335 Johnston Key Mangroves and Sawyer Key). Sawyer Key had up to 1-m thick wrackline of  
336 seagrass and sponges along the shore and the Snipe Keys had a layer of storm mud in the  
337 mangroves. Although the hardbottom extended all the way to the mangrove shoreline in many of  
338 these areas, there was a layer of unconsolidated sediment 5 to 15 cm thick covering it, impeding  
339 coral survival close to the mangroves. These observations are consistent with reports of storm  
340 damage in the mangroves after Hurricane Irma. Radabaugh et al. (2019) reported widespread  
341 mortality in Lower Keys mangroves and sedimentary storm-surge deposits ranging from 1–7 cm  
342 thick. Additionally, severe shoreline erosion occurred in several locations and seagrass wrack  
343 along some mangrove shorelines was 5–15 cm thick in the months immediately after the storm  
344 (R Moyer, 2017, unpublished data). These open-water shorelines appear to be prime potential  
345 coral habitat (clear, oceanic water combined with hardbottom and mangrove-lined shoreline).  
346 From the observed coral rubble, scrubbed prop roots, and unconsolidated sediment layer, we  
347 infer that there may have been prop-root- or channel-coral habitat in these areas, but that  
348 Hurricane Irma destroyed them. This type of destruction in the highly diverse mangrove-coral  
349 habitat in the U.S. Virgin Islands was documented in the wake of Hurricanes Irma and Maria in  
350 2017 (Rogers 2019). This suggests that these areas may be worth reassessing in 3 to 5 years to  
351 see if new diverse coral communities become established as the mangrove habitats continue to  
352 recover.

353  
354 Due to time, weather, and funding limitations, our surveys did not include all possible mangrove  
355 shoreline targets in the Florida Keys, so additional locations with mangrove-coral habitats are  
356 likely yet to be identified. There are over 1,400 linear km of mangrove shoreline in the Lower  
357 Keys alone [estimated from [http://geodata.myfwc.com/datasets/esi-shoreline-classification-](http://geodata.myfwc.com/datasets/esi-shoreline-classification-lines-florida)  
358 [lines-florida](http://geodata.myfwc.com/datasets/esi-shoreline-classification-lines-florida)]. While the survey approach employed in this study used informed decisions to  
359 target those areas with the highest probability of hosting mangrove-coral habitats, some areas

360 that were missed by this initial effort may host even higher coral diversity than the ones  
361 documented here. Over 30 species of scleractinian corals have been described in mangrove  
362 habitats of the U.S. Virgin Islands, demonstrating that mangroves can host a high-diversity  
363 assemblage of corals if the environmental conditions are favorable (Rogers 2017).

364  
365

## 366 **Conclusions**

367 This study was a first effort to locate and characterize mangrove-coral habitats in the Florida  
368 Keys. We documented areas where corals were growing directly on and under mangrove prop  
369 roots (prop-root-coral habitats) and where they were growing under the shade of the mangrove  
370 canopy (channel-coral habitats). Areas with corals growing on prop roots were characterized by  
371 roots hanging into undercut channels and/or with strong tidal currents and often connections to  
372 adjacent open-ocean waters. Coral species found growing on and directly adjacent to prop roots  
373 included *P. porites* (multiple morphs), *S. radians* and *F. fragum*. Channel-coral habitats  
374 predominantly hosted *S. radians*, although single colonies of *Solenastrea bournoni* and  
375 *Stephanocoenia intersepta* and several *S. siderastrea* were observed. There is circumstantial  
376 evidence that suggests additional mangrove-coral habitats existed on oceanside and backcountry  
377 islands but were destroyed by Hurricane Irma. These mangrove-coral habitats may be refugia for  
378 corals threatened by climate change and disease outbreaks. Further evaluation is needed to  
379 determine if these habitats could contribute to coral restoration efforts; for example, as a source  
380 of adapted high-resilience genetic materials, or as locations to support the growth and  
381 acclimation of coral outplants in areas that may be at lower risk of coral bleaching, disease, or  
382 storm damage.

383

## 384 **Acknowledgements**

385 The authors thank J. Voelschow for assisting with data formatting, B. Williams for converting KMZ files to ArcGIS  
386 maps and estimating the area surveyed via track lines, and B. Boynton for layout of photo plates. We are grateful to  
387 A. Franklin for geospatial technology support. Any use of trade, firm, or product names is for descriptive purposes  
388 only and does not imply endorsement by the U.S. Government or the State of Florida.

389

390

391

392

## 393 **References**

394

- 395 Alongi DM. 2014. Carbon cycling and storage in mangrove forests. *Annual Review of Marine*  
396 *Science* 6:195-219. 10.1146/annurev-marine-010213-135020  
397 Baker AC, Glynn PW, and Riegl B. 2008. Climate change and coral reef bleaching: An  
398 ecological assessment of long-term impacts, recovery trends and future outlook.  
399 *Estuarine Coastal and Shelf Science* 80:435-471. 10.1016/j.ecss.2008.09.003  
400 Baums IB. 2008. A restoration genetics guide for coral reef conservation. *Molecular Ecology*  
401 17:2796-2811. 10.1111/j.1365-294X.2008.03787.x

- 402 Baums IB, Baker AC, Davies SW, Grottoli AG, Kenkel CD, Kitchen SA, Kuffner IB, LaJeunesse  
403 TC, Matz MV, Miller MW, Parkinson JE, and Shantz AA. 2019. Considerations for  
404 maximizing the adaptive potential of restored coral populations in the western Atlantic.  
405 *Ecological Applications* 29:e01978. 10.1002/eap.1978
- 406 Briceño HO, and Boyer JN. 2015. 2014 Annual report of the Water Quality Monitoring Project for  
407 the Water Quality Protection Program of the Florida Keys National Marine Sanctuary.  
408 [http://ocean.floridamarine.org/FKNMS\\_WQPP/docs/wqmp/reports/2014\\_WQMP\\_Annual](http://ocean.floridamarine.org/FKNMS_WQPP/docs/wqmp/reports/2014_WQMP_Annual_Report.pdf)  
409 [\\_Report.pdf](http://ocean.floridamarine.org/FKNMS_WQPP/docs/wqmp/reports/2014_WQMP_Annual_Report.pdf): Technical Report #726T, Southeast Environmental Research Center,  
410 Florida International University.
- 411 Bruckner AW, and Hill RL. 2009. Ten years of change to coral communities off Mona and  
412 Desecheo Islands, Puerto Rico, from disease and bleaching. *Diseases of Aquatic*  
413 *Organisms* 87:19-31.
- 414 Burke L, Reytar K, Spalding M, and Perry A. 2011. Reefs at Risk. Washington, DC: World  
415 Resources Institute.
- 416 Camp EF, Edmondson J, Doheny A, Rumney J, Grima AJ, Huete A, and Suggett DJ. 2019.  
417 Mangrove lagoons of the Great Barrier Reef support coral populations persisting under  
418 extreme environmental conditions. *Marine Ecology Progress Series* 625:1-14.  
419 10.3354/meps13073
- 420 Camp EF, Nitschke MR, Rodolfo-Metalpa R, Houlbrèque F, Gardner SG, Smith DJ, Zampighi  
421 M, and Suggett DJ. 2017. Reef-building corals thrive within hot-acidified and  
422 deoxygenated waters. *Scientific Reports* 7:2434. 10.1038/s41598-017-02383-y
- 423 Comeau S, Edmunds PJ, Spindel NB, and Carpenter RC. 2014. Fast coral reef calcifiers are  
424 more sensitive to ocean acidification in short-term laboratory incubations. *Limnology and*  
425 *Oceanography* 59:1081-1091. 10.4319/lo.2014.59.3.1081
- 426 Davis JH, Jr. 1940. The ecology and geologic role of mangroves in Florida. Papers from  
427 Tortugas Laboratory. Washington, D.C.: Carnegie Institution of Washington. p 303-412.
- 428 Eakin CM, Morgan JA, Heron SF, Smith TB, Liu G, Alvarez-Filip L, Baca B, Bartels E, Bastidas  
429 C, Bouchon C, Brandt M, Bruckner AW, Bunkley-Williams L, Cameron A, Causey BD,  
430 Chiappone M, Christensen TRL, Crabbe MJC, Day O, de la Guardia E, Díaz-Pulido G,  
431 DiResta D, Gil-Agudelo DL, Gilliam DS, Ginsburg RN, Gore S, Guzmán HM, Hendee JC,  
432 Hernández-Delgado EA, Husain E, Jeffrey CFG, Jones RJ, Jordán-Dahlgren E,  
433 Kaufman LS, Kline DI, Kramer PA, Lang JC, Lirman D, Mallela J, Manfrino C, Maréchal  
434 J-P, Marks K, Mihaly J, Miller WJ, Mueller EM, Muller EM, Orozco Toro CA, Oxenford  
435 HA, Ponce-Taylor D, Quinn N, Ritchie KB, Rodríguez S, Ramírez AR, Romano S,  
436 Samhuri JF, Sánchez JA, Schmahl GP, Shank BV, Skirving WJ, Steiner SCC,  
437 Villamizar E, Walsh SM, Walter C, Weil E, Williams EH, Roberson KW, and Yusuf Y.  
438 2010. Caribbean corals in crisis: Record thermal stress, bleaching, and mortality in 2005.  
439 *PLOS ONE* 5:e13969. 10.1371/journal.pone.0013969
- 440 Eyre BD, Cyronak T, Drupp P, De Carlo EH, Sachs JP, and Andersson AJ. 2018. Coral reefs  
441 will transition to net dissolving before end of century. *Science* 359:908-911.  
442 10.1126/science.aao1118
- 443 Fabricius KE, Langdon C, Uthicke S, Humphrey C, Noonan S, De'ath G, Okazaki R,  
444 Muehllehner N, Glas MS, and Lough JM. 2011. Losers and winners in coral reefs  
445 acclimatized to elevated carbon dioxide concentrations. *Nature Climate Change* 1:165-  
446 169.
- 447 Ferrario F, Beck MW, Storlazzi CD, Micheli F, Shepard CC, and Airoidi L. 2014. The  
448 effectiveness of coral reefs for coastal hazard risk reduction and adaptation. *Nature*  
449 *Communications* 5:3794. 10.1038/ncomms4794
- 450 Frieler K, Meinshausen M, Golly A, Mengel M, Lebek K, Donner SD, and Hoegh-Guldberg O.  
451 2013. Limiting global warming to 2°C is unlikely to save most coral reefs. *Nature Climate*  
452 *Change* 3:165-170. 10.1038/NCLIMATE1674

- 453 Garcia SM, and de Leiva Moreno I. 2003. Global overview of marine fisheries. In: Sinclair M,  
454 and Valdimarsson G, eds. *Responsible Fisheries in the Marine Ecosystem*. FAO, Rome,  
455 Wallingford, UK: CAB International Publishing, 103-123.
- 456 Gardner TA, Côte IM, Gill JA, Grant A, and Watkinson AR. 2003. Long-term region-wide  
457 declines in Caribbean corals. *Science* 301:958-960. 10.1126/science.1086050
- 458 Glynn PW. 1984. Widespread coral mortality and the 1982-83 El Niño warming event.  
459 *Environmental Conservation* 11:133-146. 10.1017/S0376892900013825
- 460 Hoegh-Guldberg O, Mumby PJ, Hooten AJ, Steneck RS, Greenfield P, Gomez E, Harvell CD,  
461 Sale PF, Edwards AJ, Caldeira K, Knowlton N, Eakin CM, Iglesias-Prieto R, Muthiga N,  
462 Bradbury RH, Dubi A, and Hatziolos ME. 2007. Coral reefs under rapid climate change  
463 and ocean acidification. *Science* 318:1737-1742. 10.1126/science.1152509
- 464 Hughes TP. 1994. Catastrophes, phase-shifts and large-scale degradation of a Caribbean coral  
465 reef. *Science* 265:1547-1551.
- 466 Keller BD, Gleason DF, McLeod E, Woodley CM, Airamé S, Causey BD, Friedlander AM,  
467 Grober-Dunsmore R, Johnson JE, Miller SL, and Steneck RS. 2009. Climate change,  
468 coral reef ecosystems, and management options for marine protected areas.  
469 *Environmental Management* 44:1069-1088. 10.1007/s00267-009-9346-0
- 470 Keppel G, Van Niel KP, Wardell-Johnson GW, Yates CJ, Byrne M, Mucina L, Schut AGT,  
471 Hopper SD, and Franklin SE. 2012. Refugia: identifying and understanding safe havens  
472 for biodiversity under climate change. *Global Ecology and Biogeography* 21:393-404.  
473 10.1111/j.1466-8238.2011.00686.x
- 474 Kleypas JA, and Yates KK. 2009. Coral reefs and ocean acidification. *Oceanography* 22:108-  
475 117.
- 476 Kroeker KJ, Kordas RL, Crim R, Hendriks IE, Ramajo L, Singh GS, Duarte CM, and Gattuso J-  
477 P. 2013. Impacts of ocean acidification on marine organisms: quantifying sensitivities and  
478 interaction with warming. *Global Change Biology* 19:1884-1896. 10.1111/gcb.12179
- 479 Lesser MP. 2011. Coral bleaching: Causes and mechanisms. In: Dubinsky Z, and Stambler N,  
480 eds. *Coral Reefs: An Ecosystem in Transition*. Dordrecht: Springer Netherlands, 405-  
481 419.
- 482 Lirman D, Manzello D, and Maciá S. 2002. Back from the dead: the resilience of *Siderastrea*  
483 *radicans* to severe stress. *Coral Reefs* 21:291-292. 10.1007/s00338-002-0244-7
- 484 Lirman D, Schopmeyer S, Manzello D, Gramer LJ, Precht WF, Muller-Karger F, Banks K,  
485 Barnes B, Bartels E, Bourque A, Byrne J, Donahue S, Duquesnel J, Fisher L, Gilliam D,  
486 Hendee J, Johnson M, Maxwell K, McDevitt E, Monty J, Rueda D, Ruzicka R, and  
487 Thanner S. 2011. Severe 2010 cold-water event caused unprecedented mortality to  
488 corals of the Florida Reef Tract and reversed previous survivorship patterns. *PLOS ONE*  
489 6:e23047. 10.1371/journal.pone.0023047
- 490 Macintyre IG, Goodbody I, Rützler K, Littler DS, and Littler MM. 2000. A general biological and  
491 geological survey of the rims of ponds in the major mangrove islands of the Pelican  
492 Cays, Belize. *Atoll Research Bulletin* 467:13-44.
- 493 Manzello DP, Enochs IC, Melo N, Gledhill DK, and Johns EM. 2012. Ocean acidification refugia  
494 of the Florida Reef Tract. *PLOS ONE* 7:e41715. 10.1371/journal.pone.0041715
- 495 Miller J, Muller E, Rogers C, Waara R, Atkinson A, Whelan KRT, Patterson M, and Witcher B.  
496 2009. Coral disease following massive bleaching in 2005 causes 60% decline in coral  
497 cover on reefs in the US Virgin Islands. *Coral Reefs*. 10.1007/s00338-009-0531-7
- 498 Muehllehner N, Langdon C, Venti A, and Kadko D. 2016. Dynamics of carbonate chemistry,  
499 production, and calcification of the Florida Reef Tract (2009–2010): Evidence for  
500 seasonal dissolution. *Global Biochemical Cycles* 30:661-688. 10.1002/2015GB005327
- 501 Muller EM, Rogers CS, Spitzack AS, and van Woeseik R. 2008. Bleaching increases likelihood of  
502 disease on *Acropora palmata* (Lamarck) in Hawksnest Bay, St. John, US Virgin Islands.  
503 *Coral Reefs* 27:191-195. DOI 10.1007/s00338-007-0310-2

- 504 Muller EM, Sartor C, Alcaraz NI, and van Woesik R. 2020. Spatial epidemiology of the stony-  
505 coral-tissue-loss disease in Florida. *Frontiers in Marine Science* 7:163.  
506 10.3389/fmars.2020.00163
- 507 Mumby PJ, and Steneck RS. 2008. Coral reef management and conservation in light of rapidly  
508 evolving ecological paradigms. *Trends in Ecology and Evolution* 23:555-563.  
509 10.1016/j.tree.2008.06.011
- 510 Odum WE, Mclvor CC, and Smith TJ, III. 1982. The ecology of the mangroves of South Florida:  
511 A community profile. Washington, D.C.: U.S. Fish and Wildlife Service, Office of  
512 Biological Services. p 144.
- 513 Osland MJ, Hartmann AM, Day RH, Ross MS, Hall CT, Feher LC, and Vervaeke WC. 2019.  
514 Microclimate influences mangrove freeze damage: implications for range expansion in  
515 response to changing macroclimate. *Estuaries and Coasts* 42:1084-1096.  
516 10.1007/s12237-019-00533-1
- 517 Pandolfi JM, Bradbury RH, Sala E, Hughes TP, Bjorndal KA, Cooke RG, McArdle D,  
518 McClenachan L, Newman MJH, Paredes G, Warner RR, and Jackson JBC. 2003. Global  
519 trajectories of the long-term decline of coral reef ecosystems. *Science* 301:955-958.  
520 10.1126/science.1085706
- 521 Precht WF, Gintert BE, Robbart ML, Fura R, and van Woesik R. 2016. Unprecedented disease-  
522 related coral mortality in southeastern Florida. *Scientific Reports* 6:31374.  
523 10.1038/srep31374
- 524 Radabaugh KR, Moyer RP, Chappel AR, Dontis EE, Russo CE, Joyse KM, Bownik MW,  
525 Goeckner AH, and Khan NS. 2019. Mangrove damage, delayed mortality, and early  
526 recovery following Hurricane Irma at two landfall sites in Southwest Florida, USA.  
527 *Estuaries and Coasts* [https://doi.org/10.1007/s12237-](https://doi.org/10.1007/s12237-019-00564-8)  
528 [019-00564-8](https://doi.org/10.1007/s12237-019-00564-8) 10.1007/s12237-
- 529 Roberts HH, Rouse LJ, Jr., Walker ND, and Hudson JH. 1982. Cold-water stress in Florida Bay  
530 and northern Bahamas: A product of winter cold-air outbreaks. *Journal of Sedimentary*  
531 *Research* 52:145-155. 10.1306/212F7EFA-2B24-11D7-8648000102C1865D
- 532 Rogers CS. 2009. High diversity and abundance of scleractinian corals growing on and near  
533 mangrove prop roots, St. John, US Virgin Islands. *Coral Reefs* 28:909. 10.1007/s00338-  
534 009-0526-4
- 535 Rogers CS. 2017. A unique coral community in the mangroves of Hurricane Hole, St. John, US  
536 Virgin Islands. *Diversity* 9:29. 10.3390/d9030029
- 537 Rogers CS. 2019. Immediate effects of hurricanes on a diverse coral/mangrove ecosystem in  
538 the U.S. Virgin Islands and the potential for recovery. *Diversity* 11:130.  
539 10.3390/d11080130
- 540 Rogers CS, Muller E, Spitzack T, and Miller J. 2009. Extensive coral mortality in the US Virgin  
541 Islands in 2005/2006: A review of the evidence for synergy among thermal stress, coral  
542 bleaching and disease. *Caribbean Journal of Science* 45:204-214.
- 543 Romera-Castillo C, and Jaffé R. 2015. Free radical scavenging (antioxidant activity) of natural  
544 dissolved organic matter. *Marine Chemistry* 177:668-676.  
545 10.1016/j.marchem.2015.10.008
- 546 Salm RV, Done T, and McLeod E. 2006. Marine protected area planning in a changing climate.  
547 In: Phinney JT, Hoegh-Guldberg O, Kleypas J, Skirving W, and Strong A, eds. *Coral*  
548 *Reefs and Climate Change: Science and Management*. Washington, DC: American  
549 Geophysical Union 207-221.
- 550 Sheppard C, Dixon DJ, Gourlay M, Sheppard A, and Payet R. 2005. Coral mortality increases  
551 wave energy reaching shores protected by reef flats: Examples from the Seychelles.  
552 *Estuarine Coastal and Shelf Science* 64:223-234. 10.1016/j.ecss.2005.02.016

- 553 Silverman J, Lazar B, Cao L, Caldeira K, and Erez J. 2009. Coral reefs may start dissolving  
554 when atmospheric CO<sub>2</sub> doubles. *Geophysical Research Letters* 36:L05606.  
555 10.1029/2008GL036282
- 556 van Hooidonk R, Maynard JA, Manzello D, and Planes S. 2014. Opposite latitudinal gradients in  
557 projected ocean acidification and bleaching impacts on coral reefs. *Global Change*  
558 *Biology* 20:103-112. 10.1111/gcb.12394
- 559 Vega Thurber RL, Burkepile DE, Fuchs C, Shantz AA, McMinds R, and Zaneveld JR. 2013.  
560 Chronic nutrient enrichment increases prevalence and severity of coral disease and  
561 bleaching. *Global Change Biology* early online. 10.1111/gcb.12450
- 562 Walton CJ, Hayes NK, and Gilliam DS. 2018. Impacts of a regional, multi-year, multi-species  
563 coral disease outbreak in Southeast Florida. *Frontiers in Marine Science* 5:323.  
564 10.3389/fmars.2018.00323
- 565 Weil E, Hernández-Delgado EA, Gonzales M, Williams S, Suleimán-Ramos S, Figuerola M, and  
566 Metz-Estrella T. 2019. Spread of the new coral disease “SCTLD” into the Caribbean:  
567 implications for Puerto Rico. *Reef Encounter* 34:38-43.
- 568 Weil E, and Rogers CS. 2011. Coral reef diseases in the Atlantic-Caribbean. In: Dubinsky Z,  
569 and Stambler N, eds. *Coral Reefs: An Ecosystem in Transition*. New York: Springer.
- 570 West JM, and Salm RV. 2003. Resistance and resilience to coral bleaching: Implications for  
571 coral reef conservation and management. *Conservation Biology* 17:956-967.
- 572 Williams EH, Jr., and Bunkley-Williams L. 1990. The world-wide coral reef bleaching cycle and  
573 related sources of coral mortality. *Atoll Research Bulletin* 335:1-71.
- 574 Yates KK, Rogers CS, Herlan JJ, Brooks GR, Smiley NA, and Lawson RA. 2014. Diverse coral  
575 communities in mangrove habitats suggest a novel refuge from climate change.  
576 *Biogeosciences* 11:4321-4337. 10.5194/bg-11-4321-2014
- 577 Yates KK, Zawada DG, Smiley NA, and Tiling-Range G. 2017. Divergence of seafloor elevation  
578 and sea level rise in coral reef ecosystems. *Biogeosciences* 14:1739-1772. 10.5194/bg-  
579 14-1739-2017
- 580 Zaneveld JR, Burkepile DE, Shantz AA, Pritchard C, McMinds R, Payet JP, Welch R, Correa  
581 AMS, Lemoine NP, Rosales S, Fuchs C, Maynard JA, and Thurber RV. 2016.  
582 Overfishing and nutrient pollution interact with temperature to disrupt coral reefs down to  
583 microbial scales. *Nature Communications* 7:11833. 10.1038/ncomms11833  
584

**Table 1:**

**Mangrove-coral habitat data for Upper Florida Keys sites.** Sites indicate locations of channel corals (C), prop-root corals (P) or no corals (NC) as depicted in Figures 1 and 2. Brackets contain the number of coral colonies observed per species at a given site.

| Date    | Local Time (EDT) | Site | Location                      | Habitat   | Coral Sp.                                                                                                  | Lat/Long              | Temp (°C) | Salinity | DO (mg/L) | pH <sub>NBS</sub> | Turbidity (FNU) | Tidal State                 | Depth (m) |
|---------|------------------|------|-------------------------------|-----------|------------------------------------------------------------------------------------------------------------|-----------------------|-----------|----------|-----------|-------------------|-----------------|-----------------------------|-----------|
| 10/5/19 | 10:00            | C1   | Swan Creek                    | channel   | <i>Siderastrea siderea</i> [3],<br><i>Siderastrea radians</i> [8],<br><i>Stephanoecenia intersepta</i> [1] | 25.34798<br>-80.24977 | 27.8      | 36.32    | 4.47      | 7.93              | -0.9            | falling                     | 1.2       |
| 10/5/19 | 10:15            | C2   | Swan Creek                    | channel   | <i>S. siderea</i> [2],<br><i>S. radians</i> [2]                                                            | 25.34793<br>-80.24963 | 28.0      | 36.33    | 4.65      | 7.93              | -1.1            | falling                     | 1.4       |
| 10/5/19 | 10:25            | C3   | Swan Creek                    | channel   | <i>S. radians</i> [1]                                                                                      | 25.34819<br>-80.24959 | 28.0      | 36.34    | 4.80      | 7.91              | -1.1            | falling                     | 1.37      |
| 10/5/19 | 12:30            | C4   | Angelfish Creek               | channel   | <i>S. radians</i> [56],<br><i>Solenastrea bournoni</i> [1]                                                 | 25.3326<br>-80.2645   | 28.2      | 36.57    | 4.25      | 7.78              | -0.3            | rising                      | 1.96      |
| 10/6/19 | 10:45            | P1   | Swan Key                      | prop root | <i>Porites porites</i> [1]<br><i>S. radians</i> [1]                                                        | 25.34598<br>-80.24873 | 27.6      | 36.86    | 5.35      | 7.96              | -0.8            | falling                     | 0.39      |
| 10/6/19 | 11:40            | P2   | Swan Key                      | prop root | <i>P. porites</i> [1]                                                                                      | 25.34755<br>-80.25092 | 27.8      | 36.87    | 5.76      | 7.99              | -0.9            | falling                     | 0.48      |
| 10/6/19 | 12:05            | P3   | Swan Key                      | prop root | <i>P. porites</i> [1]                                                                                      | 25.34757<br>-80.24982 | 27.9      | 36.78    | 6.03      | 8.00              | -1.0            | falling,<br>nearly<br>slack | 0.46      |
| 10/7/19 | 13:34            | NC   | Key Largo<br>Negative control | channel   | N/A                                                                                                        | 25.1584<br>-80.3783   | 27.5      | 36.77    | 2.27      | 7.24              | -0.5            | rising                      | 0.95      |

Abbreviations: EDT – Eastern Daylight Time (GMT -4), Lat/Long – latitude and longitude in decimal degrees, DO – (optical) dissolved oxygen, FNU – Formazin Nephelometric Units, N/A – not applicable.



**Table 2:**

**Mangrove-coral habitat data for Lower Florida Keys sites.** Sites indicate locations of channel corals (C) and prop-root corals (P) as depicted in Figure 4. Shaded cells indicate revisits to a site at a different date/time. Brackets contain the number of coral colonies observed per species at a given site.

| Date    | Local Time (EDT) | Site | Location                       | Habitat   | Coral Sp.                                       | Lat/Long                 | Temp (°C) | Salinity | DO (mg/L) | pH <sub>NBS</sub> | Turbidity (FNU) | Tidal State                 | Depth (m) |
|---------|------------------|------|--------------------------------|-----------|-------------------------------------------------|--------------------------|-----------|----------|-----------|-------------------|-----------------|-----------------------------|-----------|
| 1/7/20  | 08:40            | C5   | Tarpon Creek                   | channel   | <i>Siderastrea radians</i> [>10]                | 24.628111<br>-81.51174   | 19.9      | 36.28    | 4.12      | 8.09              | 0.5             | slack                       | 0.25      |
| 1/7/20  | 16:45            | P4   | Tarpon Canal                   | prop root | <i>Porites porites</i> [1]                      | 24.631081<br>-81.512361  | 22.0      | 36.34    | 9.20      | 8.41              | 1.9             | rising                      | 0.32      |
| 1/11/20 | 10:05            | P4   | Tarpon Canal                   | prop root | <i>P. porites</i> [1]                           | 24.631081<br>-81.512361  | 22.8      | 36.66    | 5.00      | 8.07              | 1.3             | rising                      | 0.25      |
| 1/9/20  | 09:28            | P5   | Park Channel                   | prop root | <i>P. porites</i> [1]                           | 24.647889<br>-81.558723  | 20.1      | 36.24    | 6.45      | 8.33              | -0.7            | falling                     | 0.06      |
| 1/9/20  | 09:40            | P6   | Park Channel                   | prop root | <i>S. radians</i> [1]                           | 24.647813<br>-81.558667  | 20.1      | 36.27    | 6.61      | 8.35              | -0.8            | falling                     | 0.03      |
| 1/9/20  | 11:26            | C6   | 430 Sugarloaf Key Merged Canal | channel   | <i>S. radians</i> [7].                          | 24.618799.<br>-81.531484 | 20.1      | 36.39    | 6.62      | 8.4               | 0.2             | falling                     | 0.53      |
| 1/9/20  | 13:42            | P7   | 430 Sugarloaf Key Merged Canal | prop root | <i>P. porites</i> [4],<br><i>S. radians</i> [4] | 24.630163<br>-81.541481  | 21.5      | 36.37    | 8.43      | 8.70              | 0.3             | falling,<br>almost<br>slack | 0.08      |
| 1/11/20 | 11:46            | P7   | 430 Sugarloaf Key Merged Canal | prop root | <i>P. porites</i> [1]                           | 24.630163<br>-81.541481  | 23.5      | 36.46    | 6.99      | 8.38              | 1.2             | falling                     | 0.15      |
| 1/11/20 | 14:03            | P7   | 430 Sugarloaf Key              | prop root | <i>P. porites</i> [1]                           | 24.630163<br>-81.541481  | 24.3      | 36.45    | 7.88      | 8.50              | 5.10            | Falling                     | 0.08      |

|         |       |     | Merged Canal                   |           |                         |                         |      |       |      |      |     |         |       |
|---------|-------|-----|--------------------------------|-----------|-------------------------|-------------------------|------|-------|------|------|-----|---------|-------|
| 1/11/20 | 11:47 | P8  | 430 Sugarloaf Key Merged Canal | prop root | <i>Favia fragum</i> [1] | 24.630251<br>-81.541658 | 23.4 | 36.47 | 6.84 | 8.38 | 0.7 | falling | 0.049 |
| 1/9/20  | 13:00 | P9  | 430 Sugarloaf Key Merged Canal | prop root | <i>P. porites</i> [1]   | 24.630322<br>-81.541749 | ND   | ND    | ND   | ND   | ND  | ND      | ND    |
| 1/9/20  | 13:03 | P10 | 430 Sugarloaf Key Merged Canal | prop root | <i>P. porites</i> [1]   | 24.630332<br>-81.541804 | ND   | ND    | ND   | ND   | ND  | ND      | ND    |
| 1/9/20  | 13:10 | P11 | 430 Sugarloaf Key Merged Canal | prop root | <i>P. porites</i> [1]   | 24.630486<br>-81.541895 | ND   | ND    | ND   | ND   | ND  | ND      | ND    |
| 1/9/20  | 13:15 | P12 | 430 Sugarloaf Key Merged Canal | prop root | <i>P. porites</i> [1]   | 24.630723<br>-81.542168 | ND   | ND    | ND   | ND   | ND  | ND      | ND    |
| 1/9/20  | 13:20 | P13 | 430 Sugarloaf Key Merged Canal | prop root | <i>P. porites</i> [1]   | 24.630775<br>-81.542177 | ND   | ND    | ND   | ND   | ND  | ND      | ND    |
| 1/9/20  | 13:25 | P14 | 430 Sugarloaf Key Merged Canal | prop root | <i>P. porites</i> [1]   | 24.631218<br>-81.542646 | ND   | ND    | ND   | ND   | ND  | ND      | ND    |

|        |       |     |                                            |           |                       |                         |      |       |      |      |      |        |      |
|--------|-------|-----|--------------------------------------------|-----------|-----------------------|-------------------------|------|-------|------|------|------|--------|------|
| 1/9/20 | 13:30 | P15 | 430<br>Sugarloaf<br>Key<br>Merged<br>Canal | prop root | <i>P. porites</i> [1] | 24.631868<br>-81.543327 | ND   | ND    | ND   | ND   | ND   | ND     | ND   |
| 1/9/20 | 16:25 | P16 | Five Mile<br>Creek                         | prop root | <i>P. porites</i> [1] | 24.649801<br>-81.596691 | 20.7 | 36.24 | 7.62 | 8.60 | -0.8 | rising | 0.15 |

Abbreviations: EDT – Eastern Daylight Time (GMT -4), Lat/Long – latitude and longitude in decimal degrees, DO – (optical) dissolved oxygen, FNU – Formazin Nephelometric Units, ND – not determined.

**Table 3:**  
**Comparison between environmental parameters in prop-root coral habitats and non-target habitats in the Lower Florida Keys.** All data collected on January 11, 2020. Shading indicates prop-root coral habitats.

| Local Time (EDT) | Habitat                              | Description                                        | Lat/Long            | Temp (°C) | Salinity | DO (mg/L) | pH <sub>NBS</sub> | Turbidity (FNU) | Tidal State | Depth (m) | Notes                                                                                             |
|------------------|--------------------------------------|----------------------------------------------------|---------------------|-----------|----------|-----------|-------------------|-----------------|-------------|-----------|---------------------------------------------------------------------------------------------------|
| 09:50            | Coastal Atlantic                     | Oceanside, in boat channel outside of Tarpon Canal | 24.6305<br>-81.5066 | 22.6      | 36.37    | 6.57      | 8.30              | 3.7             | rising      | 0.20      | Open water, no proximity to corals or mangroves                                                   |
| 09:55            | Mangrove canal                       | Oceanside entrance, Tarpon Canal                   | 24.6316<br>-81.5091 | 22.8      | 36.52    | 6.40      | 8.24              | 4.4             | rising      | 0.01      | Mid-channel, mangroves line channel edges                                                         |
| 10:05            | Prop-root coral (P4)                 | Interior, Tarpon Canal                             | 24.6311<br>-81.5124 | 22.8      | 36.66    | 5.00      | 8.07              | 1.3             | rising      | 0.25      | Single mature <i>Porites</i> colony growing on mangrove prop root, north side of canal            |
| 10:06            | Canal-coral proximity                | Interior, Tarpon Canal                             | 24.6311<br>-81.5124 | 22.8      | 36.59    | 5.57      | 8.16              | 1.5             | rising      | 0.22      | Mid-channel reading parallel with site Prop-root coral site P4                                    |
| 10:16            | Mangrove canal                       | Interior, Tarpon Canal                             | 24.6307<br>-81.5146 | 23.0      | 36.70    | 5.44      | 8.10              | 1.5             | rising      | 0.06      | Against mangroves without corals, north side of canal almost opposite opening to Tarpon Creek     |
| 10:32            | Inland waterway                      | Upper Sugarloaf Sound                              | 24.6382<br>-81.5276 | 23.1      | 36.42    | 6.91      | 8.48              | 3.0             | slack       | 0.88      | Open water, mid-basin, no proximity to corals or mangroves                                        |
| 11:44            | Channel coral & prop-root coral area | 430 Sugarloaf Key Merged Canal                     | 24.6302<br>-81.5415 | 23.5      | 36.42    | 7.10      | 8.38              | 0.8             | falling     | 0.089     | Mid-channel reading parallel with prop-root coral site P7                                         |
| 11:46            | Prop-root coral (P7)                 | 430 Sugarloaf Key Merged Canal                     | 24.6302<br>-81.5415 | 23.5      | 36.46    | 6.99      | 8.38              | 1.2             | falling     | 0.15      | Multiple <i>Porites</i> colonies growing on mangrove prop roots of same plant, east side of canal |
| 11:47            | Prop-root coral (P8)                 | 430 Sugarloaf Key Merged Canal                     | 24.6303<br>-81.5417 | 23.4      | 36.47    | 6.84      | 8.38              | 0.7             | falling     | 0.049     | Small colony of <i>Favia</i> growing on mangrove prop root, west side of canal                    |

|       |                    |                                |                     |      |       |      |      |      |         |       |                                                                                                |
|-------|--------------------|--------------------------------|---------------------|------|-------|------|------|------|---------|-------|------------------------------------------------------------------------------------------------|
| 11:53 | Mangrove canal     | 430 Sugarloaf Key Merged Canal | 24.6320<br>-81.5433 | 23.8 | 36.39 | 7.48 | 8.43 | 1.1  | falling | 0.024 | Mid-channel, near marker pole at Sugarloaf Sound entrance to canal                             |
| 14:52 | Channel coral area | 430 Sugarloaf Key Merged Canal | 24.6205<br>-81.5319 | 24.3 | 36.43 | 7.69 | 8.67 | 3.20 | falling | 0.08  | Mid-channel, thick mangroves along sides, channel corals on rock walls but no prop-root corals |

Abbreviations: EDT – Eastern Daylight Time (GMT -4), Lat/Long – latitude and longitude in decimal degrees, DO – (optical) dissolved oxygen, FNU – Formazin Nephelometric Units.

**Figure 1. Upper Florida Keys surveys in the vicinity of Card Sound.** Yellow lines indicate shoreline and channels surveyed. Red points labeled P1, P2, and P3 indicate prop-root-coral sites described in Table 1. Blue points labeled C1, C2, C3 and C4 indicate channel-coral sites described in Table 1. Map image is the intellectual property of Esri and is used herein under license. Copyright ©2019 Esri and its licensors. All rights reserved.

**Figure 2. Upper Florida Keys surveys around Largo Sound.** Yellow lines indicate shoreline and channels surveyed. Purple point labeled NC indicates reference site sampled for environmental parameters described in Table 1. Map image is the intellectual property of Esri and is used herein under license. Copyright ©2019 Esri and its licensors. All rights reserved.

**Figure 3. Selected images of mangrove-coral habitats in the Upper Florida Keys.** Panel A = *Siderastrea radians*, site C1, B = *S. radians*, site C1, C = *S. radians*, site C2, D = *Porites porites*, site P1, E = *P. porites*, site P2, F = *P. porites*, site P3.

**Figure 4. Lower Florida Keys Surveys.** Yellow lines indicate shoreline and channels surveyed. Red points labeled P4 to P16 indicate prop-root-coral sites described in Table 2. Blue points labeled C5 and C6 indicate channel-coral sites described in Table 2. Map image is the intellectual property of Esri and is used herein under license. Copyright ©2019 Esri and its licensors. All rights reserved.

**Figure 5. Selected images of mangrove-coral habitats in the Lower Florida Keys.** Panel A = *Siderastrea radians*, site C5, B = *Porites porites*, site P4, C = *P. porites*, site P5, D = *S. radians*, site C6, E = *P. porites*, site P7, F = *P. porites*, site P16.

## Funding

This research project was funded in part by a grant awarded from Mote Marine Laboratory's Protect Our Reefs Grants Program, which is funded by proceeds from the sale of the Protect Our Reefs specialty license plate. CA Kellogg and KK Yates were supported by the U.S. Geological Survey (USGS) Coastal-Marine Hazards and Resources Program of the Hazards Mission Area and RP Moyer and M Jacobsen were supported by the Ecosystem Assessment and Restoration section of the Florida Fish and Wildlife Conservation Commission's Fish and Wildlife Research Institute.

25°24'N

25°22'N

25°20'N

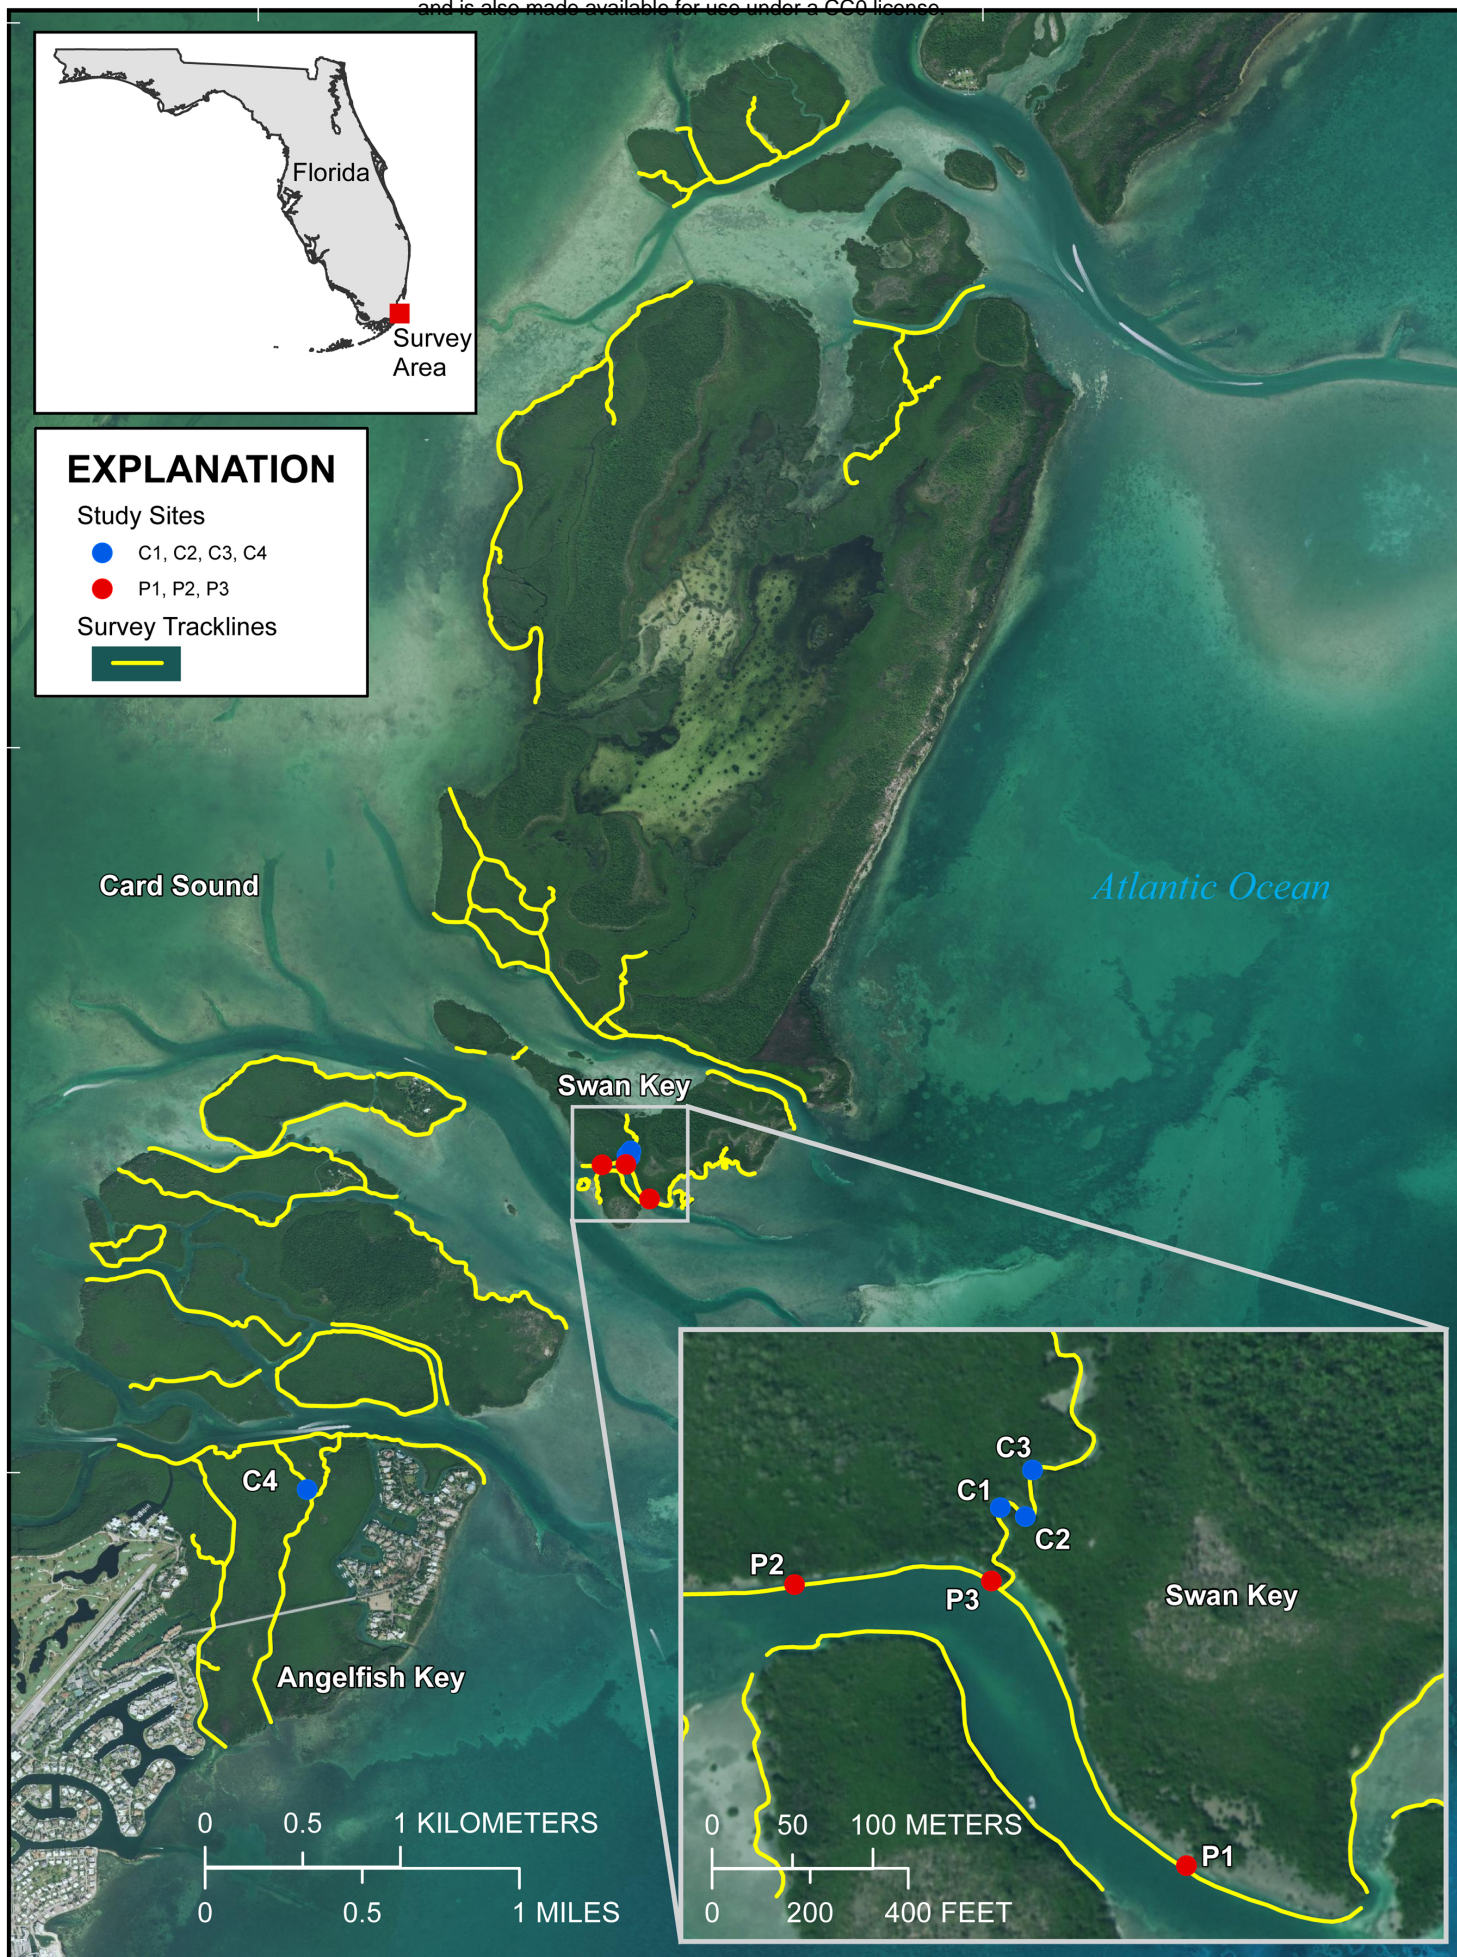

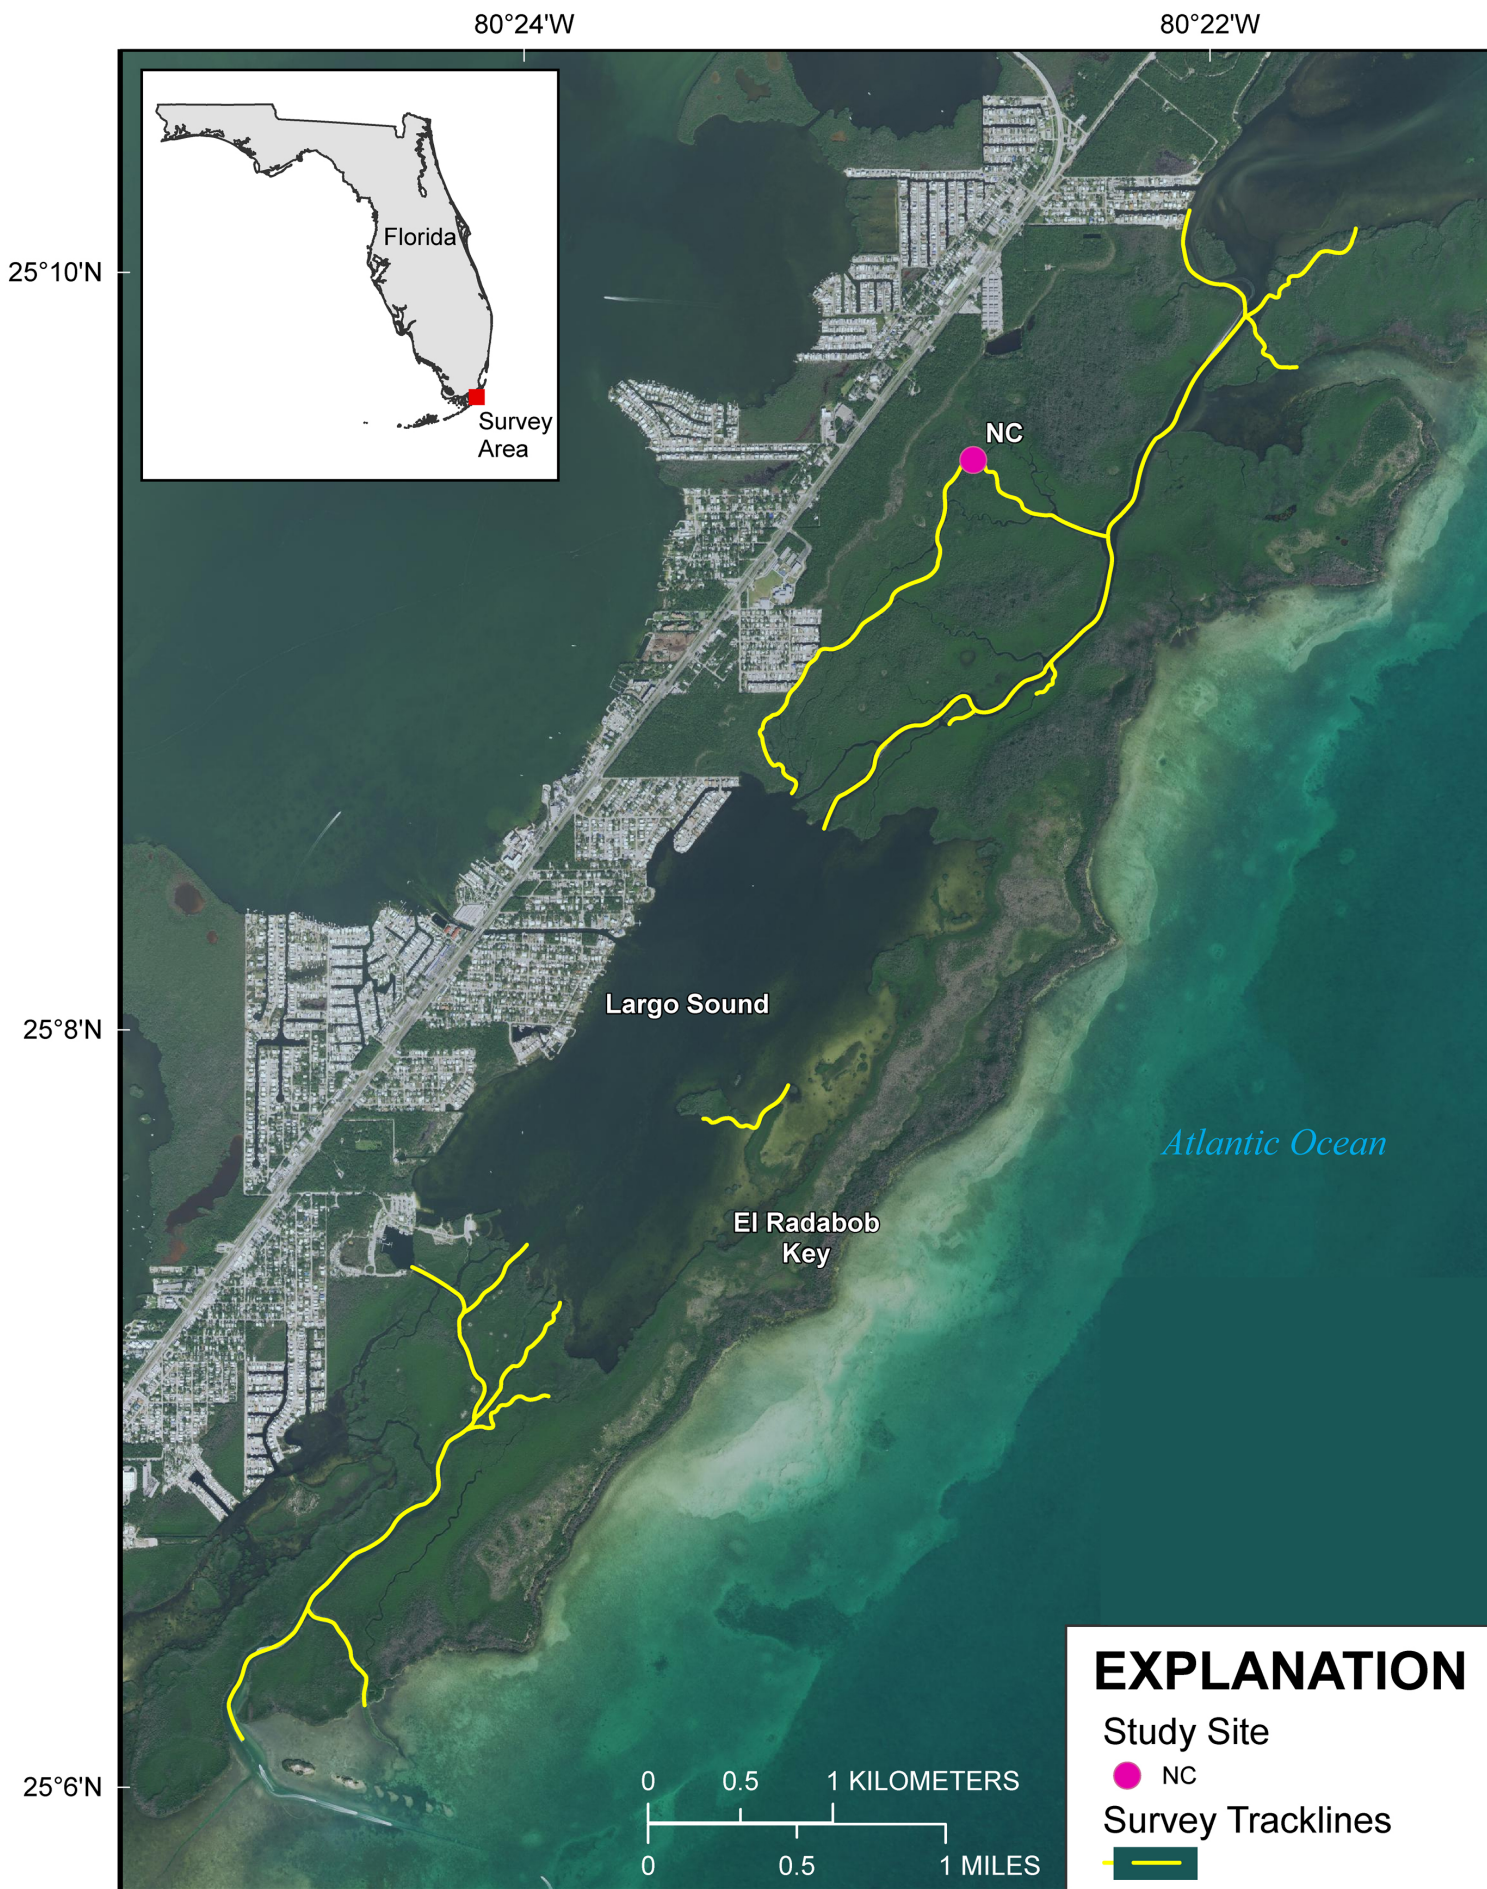



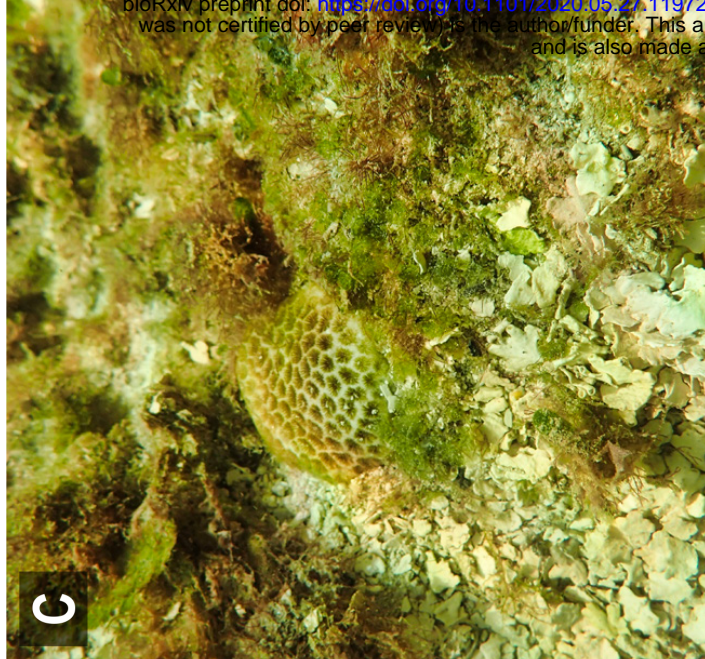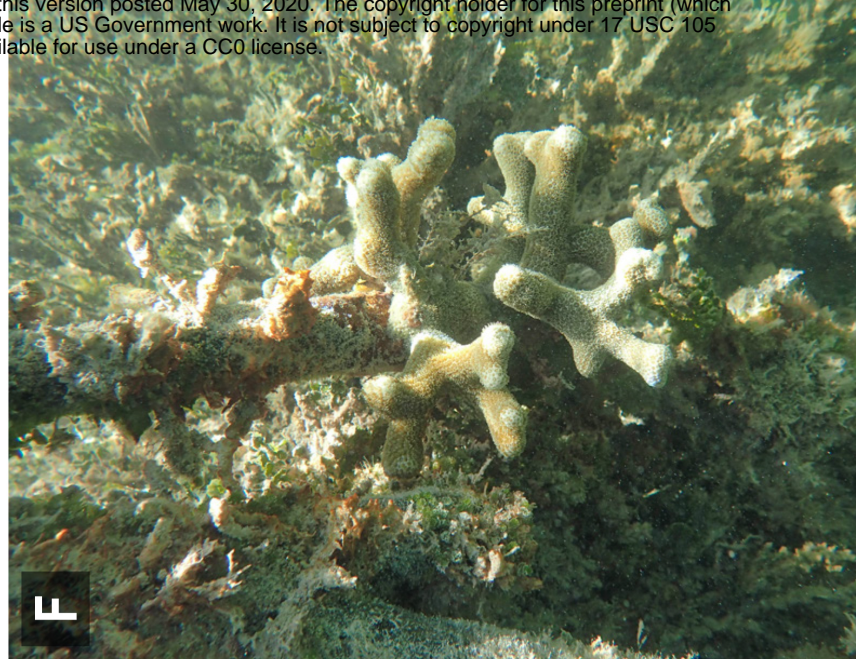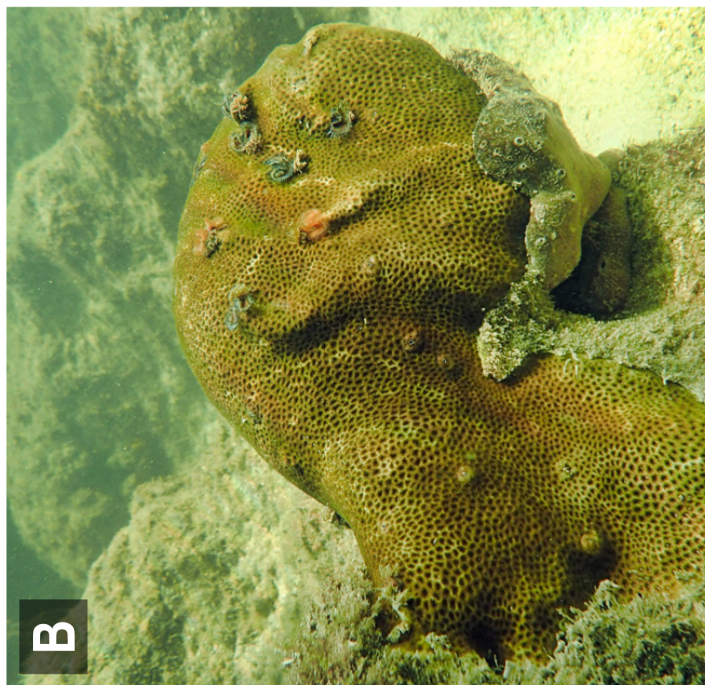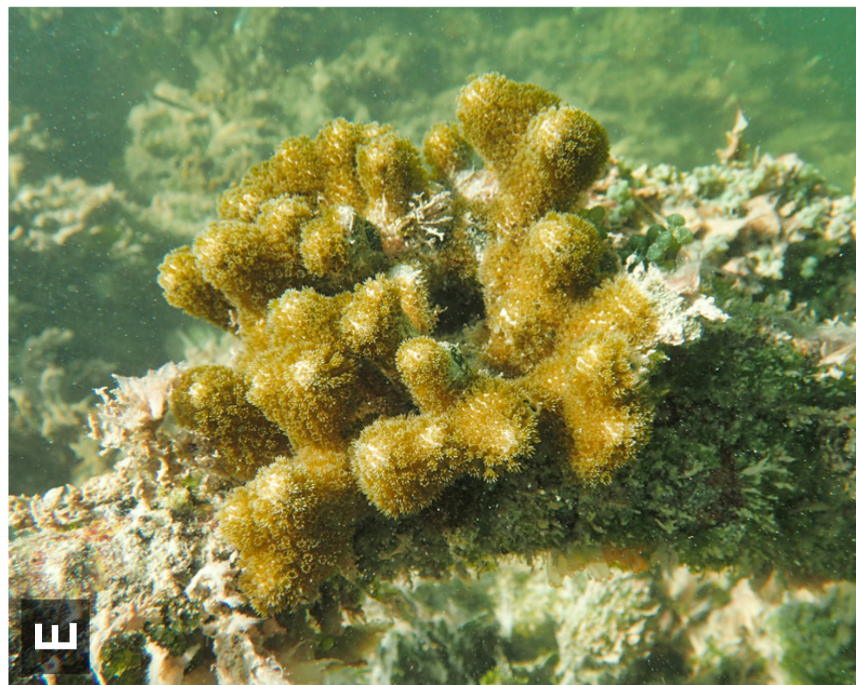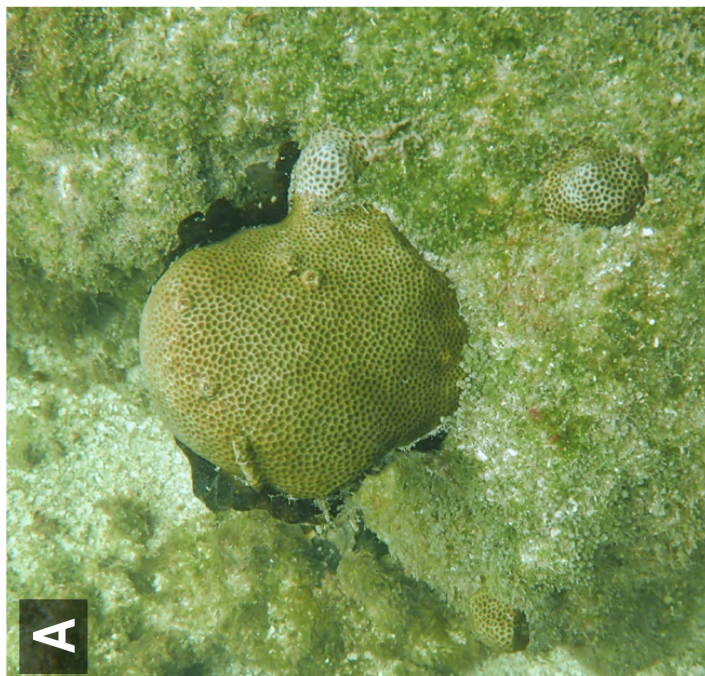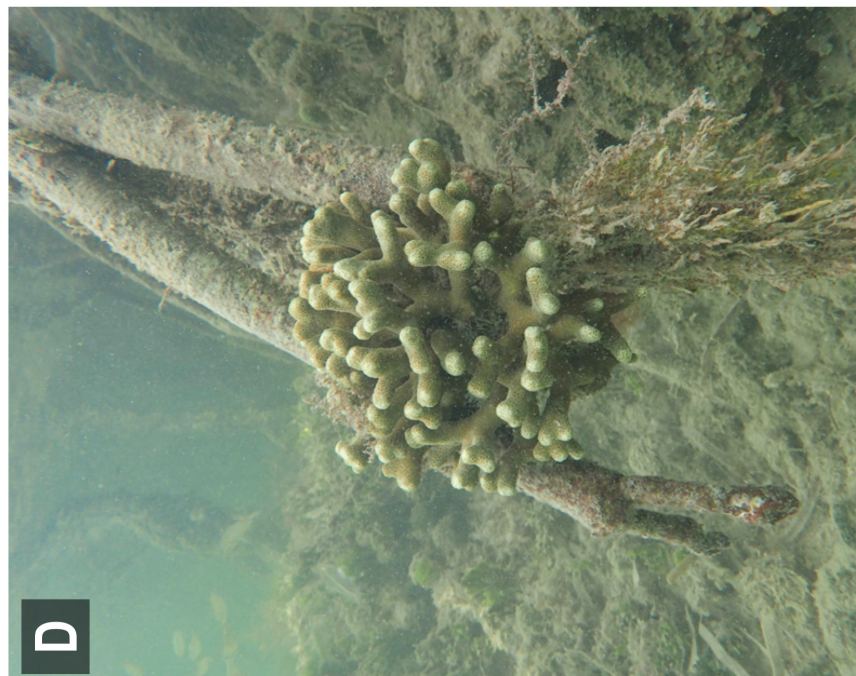

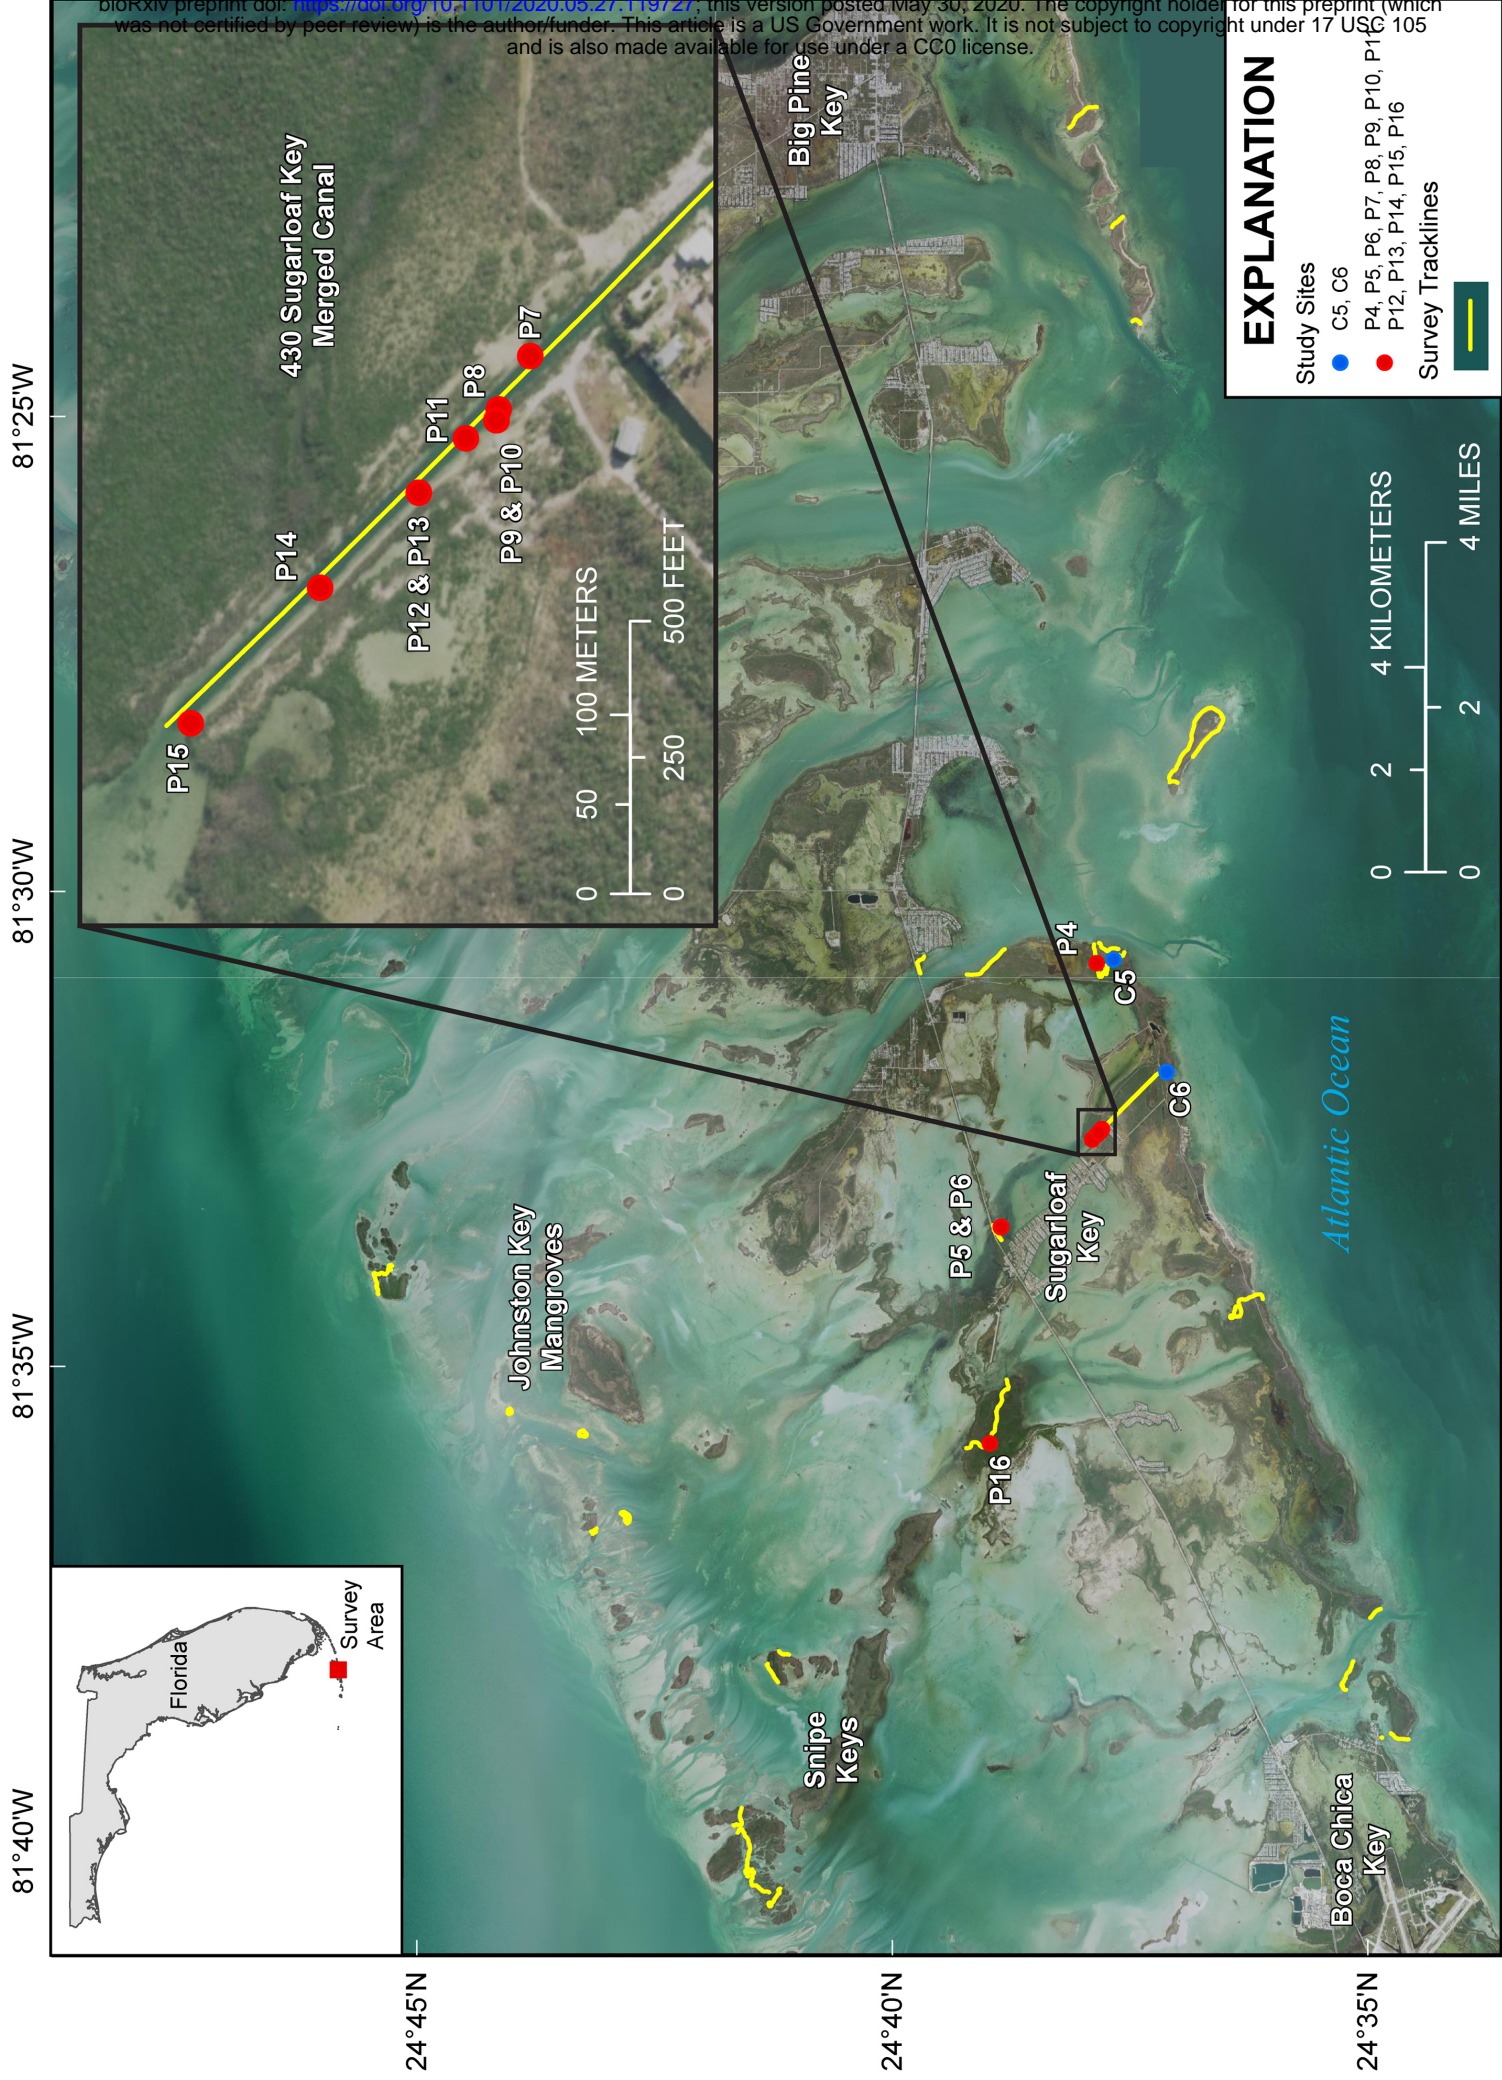

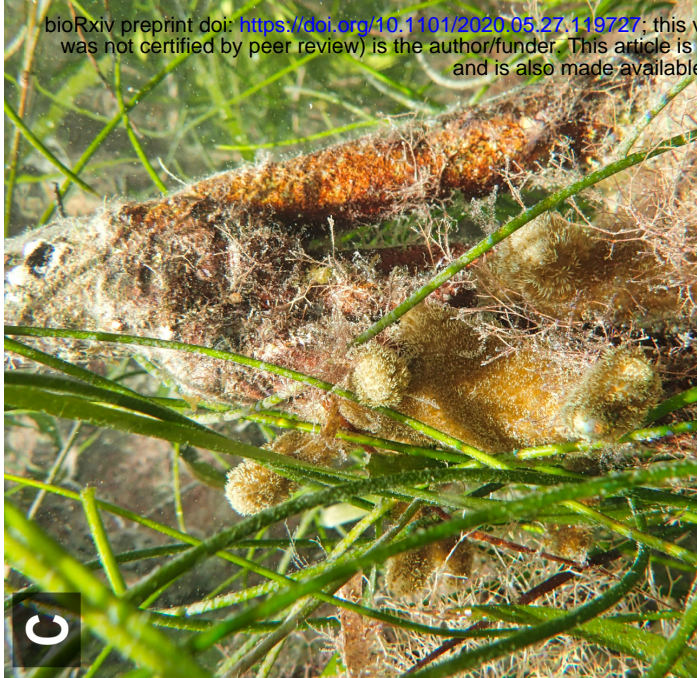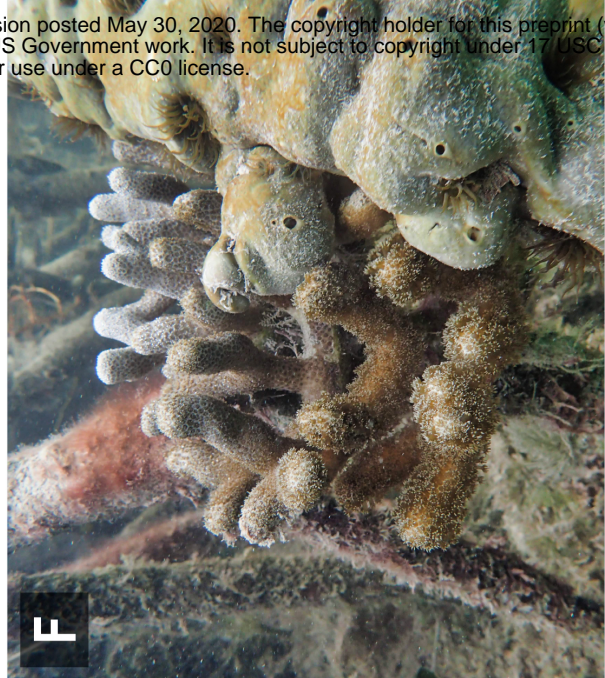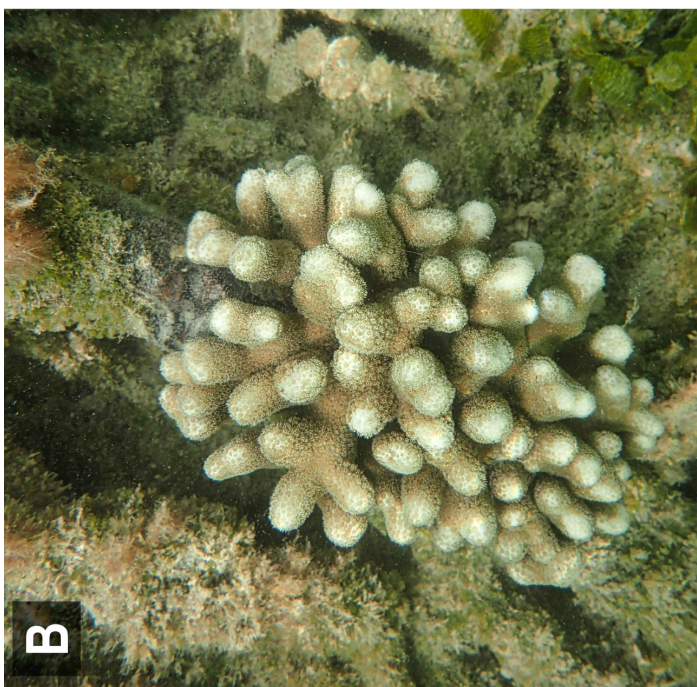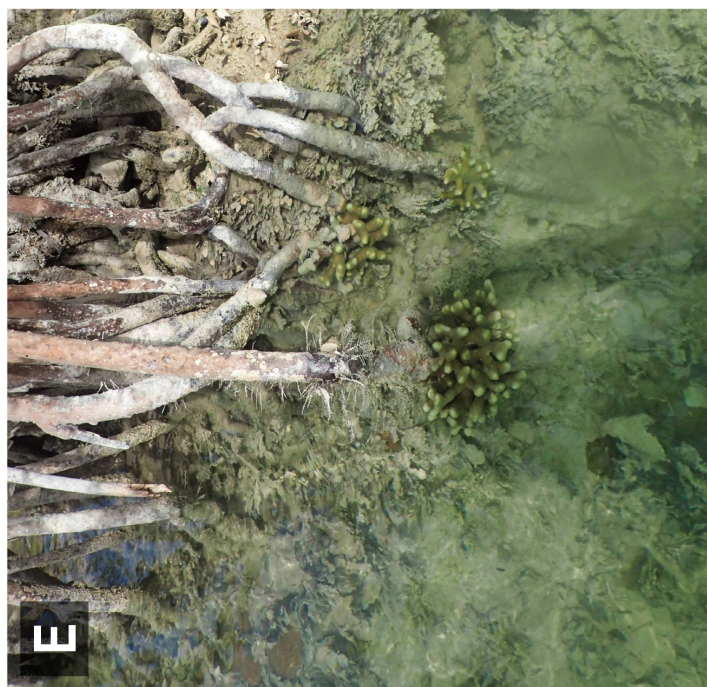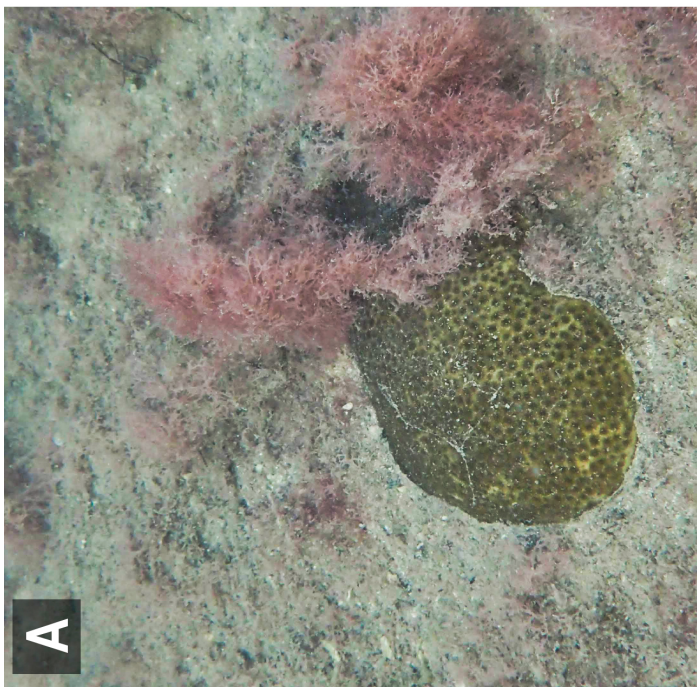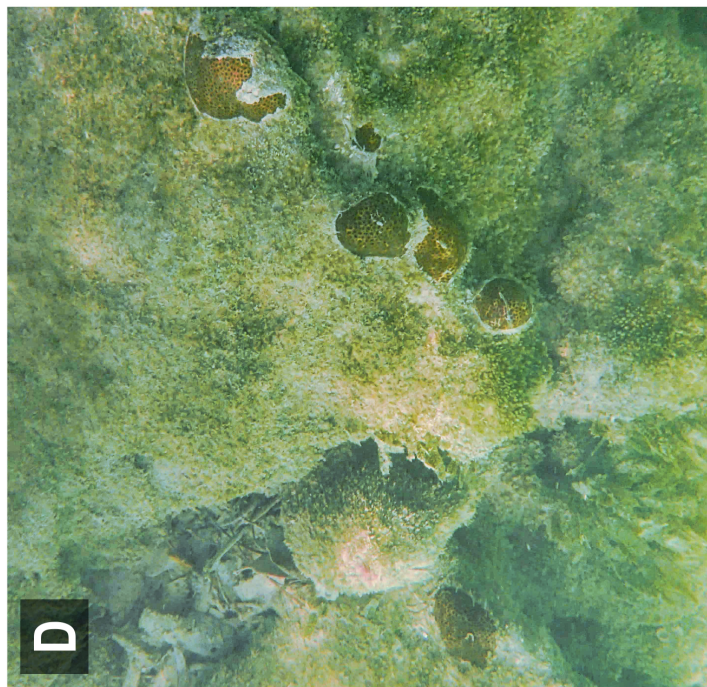

Source: https://biorxiv.org/content/10.1101/2020.05.27.119727v1.full.pdf
